# Supplementary material for: Preparation and photophysical properties of quinazoline-based fluorophores
Source: Royal Society of Chemistry journal article supplement (doi:10.1039/d0ra05701k), 2020-01-01
Supplement: d0ra05701k1.pdf [file d0ra05701k1.pdf]

## Supporting information

### **Preparation and photophysical properties of quinazoline-based fluorophores**

Zhichao Wang, Hanjie Li, Zhixing Peng, Zaibin Wang, Yanguang Wang\*, Ping Lu\*

Department of Chemistry, Zhejiang University, Hangzhou 310027, P. R. China

## Content

1. **Experimental Procedures**
2. **Figure S1** Synthesis of quinazolines **A, B** and compounds **1-10**.
3. **Figures S2-37**  $^1\text{H}$  NMR,  $^{13}\text{C}$  NMR and  $^{19}\text{F}$  NMR of quinazolines **A, B** and compounds **1-10**.
4. **Table S1** Single crystal data of compounds **1-4**.
5. **Figure S38** Thermogravimetric Analysis of ten compounds.
6. **Figures S39-40** Photophysical properties of compounds **1-10** in different solvent.
7. **Table S2** Solvent effect on absorption and emission of ten compounds.
8. **Figure S41** Fluorescence decay traces of ten compounds in cyclohexane (compounds 5 and 10) or toluene (other compounds) at  $2 \times 10^{-5}$  M.
9. **Figures S42-43** (a) 3D Emission spectrum in aqueous THF solutions, (b) the relative intensity and photos and (c) DLS (fw = 90%, 95%) of compounds **1-5** and **6-10**.
10. **Figure S44** TEM image in aqueous THF solutions of **2** (fw = 95%), **3** (fw = 95%), **4** (fw = 90%), **6** (fw = 80%), **7** (fw = 80%), **9** (fw = 95%).
11. **Figure S45** Mechanochromic property of compounds **1, 2, 4** and **7**; a) normalized emission spectra; b) emission cycles.
12. **Figure S46** SAXS analysis in the cycle of pristine (a) and ground (b), repeatable cycles, monitored by emission spectra (c) emission cycles.
13. **Figure S47** Cyclic voltammograms of ten compounds.
14. **Table S3** HOMO/LUMO levels calculated from theoretical calculation and CV as well as UV measurements.
15. **Figure S48** C-I-V curves of devices **A, B, C** and **D**.
16. **Table S4** Device performance.

## Experimental Procedures

## Material and Instruments

Unless otherwise mentioned, solvents and reagents were purchased from commercial sources and used as received. For the purpose of the measurement of photophysical properties, THF was distilled from sodium. Melting points were measured with a micro melting point apparatus. Infrared spectra were obtained with an FTIR spectrometer. NMR spectra were operated at 400 MHz for  $^1\text{H}$  NMR, 101 MHz for  $^{13}\text{C}$  NMR, 376 MHz for  $^{19}\text{F}$  NMR. All the NMR spectra were recorded at room temperature. Chemical shifts were quoted in parts per million (ppm) referred to the appropriate solvent peak or 0.0 ppm for tetramethylsilane. The following abbreviations are used to describe peak patterns as appropriate: s = singlet, d = doublet, t = triplet, q = quartet, m = multiplet. Coupling constants J were reported in hertz. High-resolution mass spectra (HRMS) data were obtained with matrix-assisted laser desorption ionization time-of-flight (MALDI-TOF) mass spectrometer. Flash column chromatography was performed employing 300-400 mesh silica gel. Thin layer chromatography (TLC) was performed on silica gel HSGF254. The absorption spectra were measured using UV-vis spectrometer. FL spectra were recorded on a fluorospectrophotometer with a xenon lamp excitation source. PL decay dynamics were measured on a time correlated single-photon counting (TCSPC) spectrofluorometer at room temperature, and the compounds were excited at its corresponding maximum absorption wavelength by picosecond laser diode. Cyclic voltammetry measurements were performed on an electrochemical analyzer in dichloromethane at room temperature. Thermogravimetric Analysis (TGA) was obtained with a thermal analyzer at heating and cooling rates of 10 K/min under an  $\text{N}_2$  atmosphere. CLSM images were recorded with a Leica TCS SP5 confocal scanning system.

Device Fabrication: before device fabrication, the ITO glass substrates were pre-cleaned carefully. Then hole transporting material PEDOT: PSS was made with 4000 r/s for 45 s and annealing 25 min at 150°C. Emission Layer was prepared in chlorobenzene. Then it was made with 3000 r/s for 50 s and annealing 20 min at 100°C. After the organic film deposition, 40 nm of TPBi, 1.5 nm of LiF and 50 nm of aluminium were thermally evaporated onto the organic surface.

## General procedure for synthesis of organic molecular

## 1. Synthesis of quinazolines **A** and **B**

**A** and **B** were synthesized according to reported literature<sup>1</sup>.

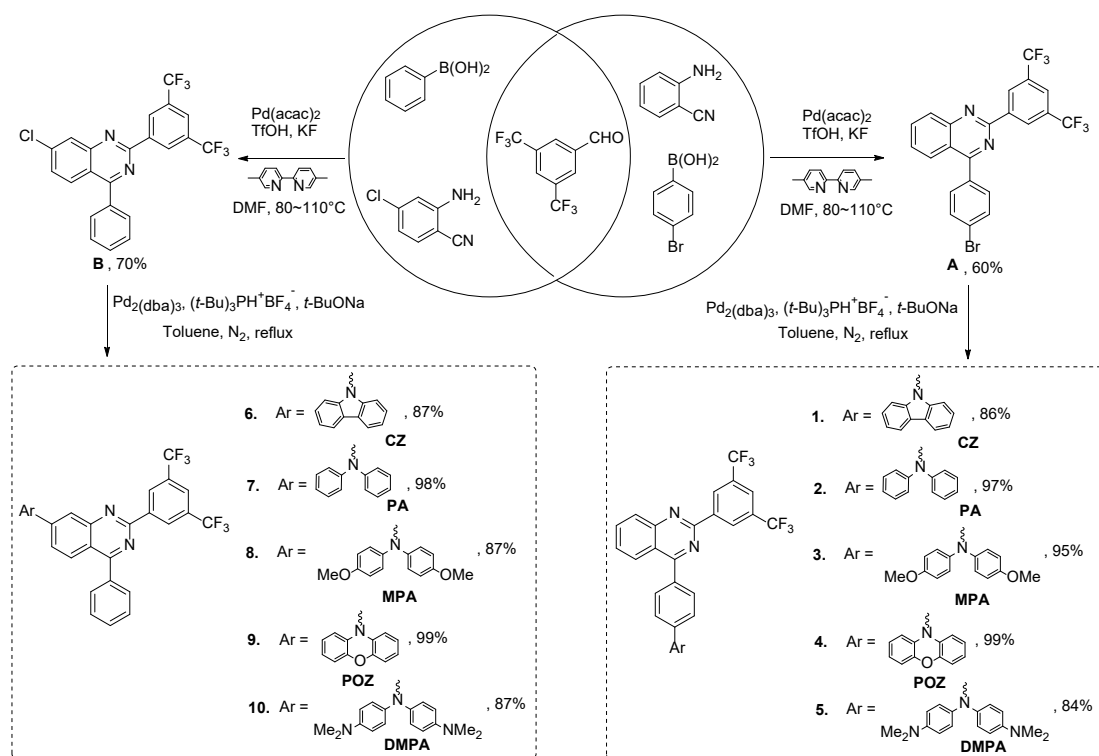

**Figure S1** Synthetic route to target molecules **1-10**

2-Aminobenzonitriles (177mg, 1.5mmol), arylboronic acids (750mg, 3.75mmol), aldehydes (726mg, 3mmol),  $\text{Pd}(\text{acac})_2$  (5mol%), Ligand (10mol%) and  $\text{KF}$  (2equiv) were added into the schrenk tube (100mL).  $\text{DMF}$  (15mL) was added to dissolve the reactants. Stirring until the reactants completely dissolved,  $\text{TfOH}$  (4 equiv) was added. Keep the temperature at  $80\text{--}110^\circ\text{C}$  for 48 h under air. After cooling to room temperature, the reaction mixture was poured into  $\text{DCM}$ , which was washed with saturated  $\text{NaHCO}_3$  ( $2 \times 50\text{ mL}$ ) and then brine ( $1 \times 50\text{ mL}$ ). The organic layers were separated, dried over anhydrous  $\text{Na}_2\text{SO}_4$  and evaporated under a vacuum. The residue was purified by flash column chromatography with petroleum ether:  $\text{DCM} = 4:1$  to afford the desired product as a white solid, yield 60% for **A** and 70% for **B**, respectively.

Quinazoline **A**:  $^1\text{H NMR}$  (400 MHz,  $\text{Chloroform-d}$ )  $\delta$  9.17 (s, 2H), 8.22 (d,  $J = 8.5\text{ Hz}$ , 1H), 8.12 (d,  $J = 8.4\text{ Hz}$ , 1H), 8.04 – 7.93 (m, 2H), 7.78 (s, 4H), 7.65 (t,  $J = 7.6\text{ Hz}$ , 1H).  $^{13}\text{C NMR}$  (101 MHz,  $\text{CDCl}_3$ )  $\delta$  167.8, 157.2, 151.8, 140.1, 135.9, 134.3, 131.9 (q,  $J = 34.4\text{ Hz}$ ), 132.0, 131.8, 129.5, 128.6, 128.6, 128.3, 126.8, 125.1, 123.9, 123.5 (q,  $J = 272.9\text{ Hz}$ ), 121.9.  $^{19}\text{F NMR}$  (376 MHz,  $\text{CDCl}_3$ )  $\delta$  -62.67.

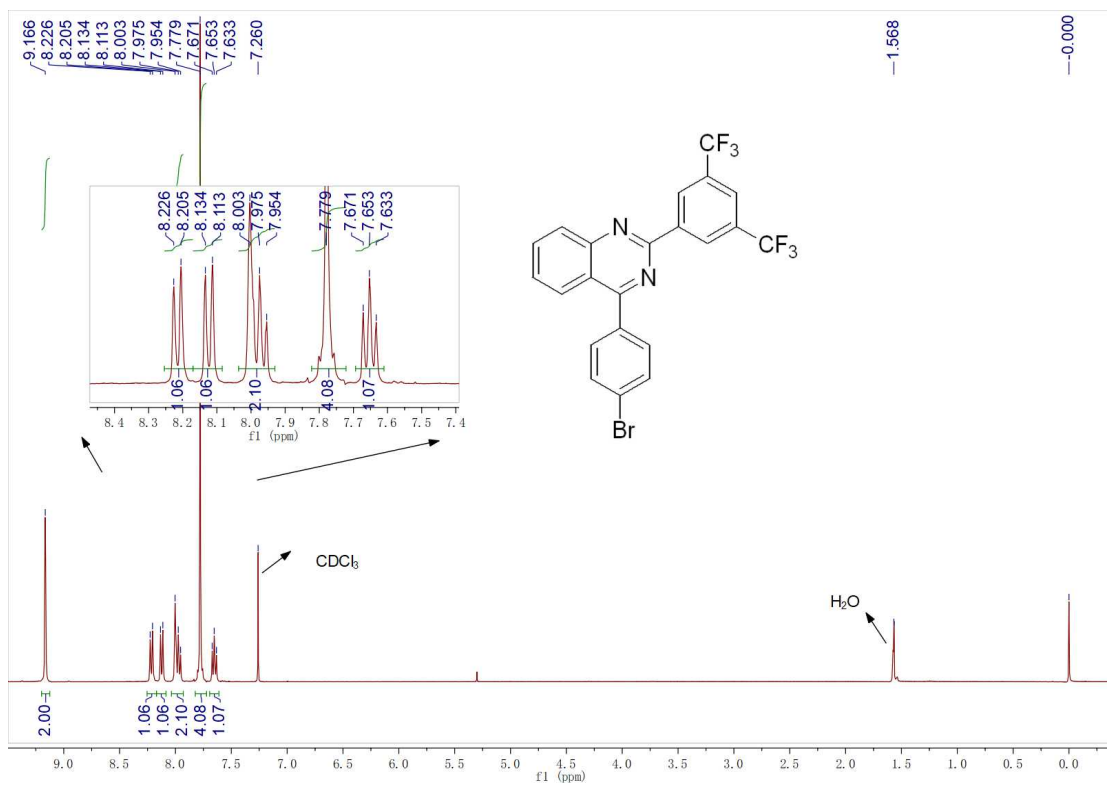

Figure S2 <sup>1</sup>H NMR of A in CDCl<sub>3</sub>

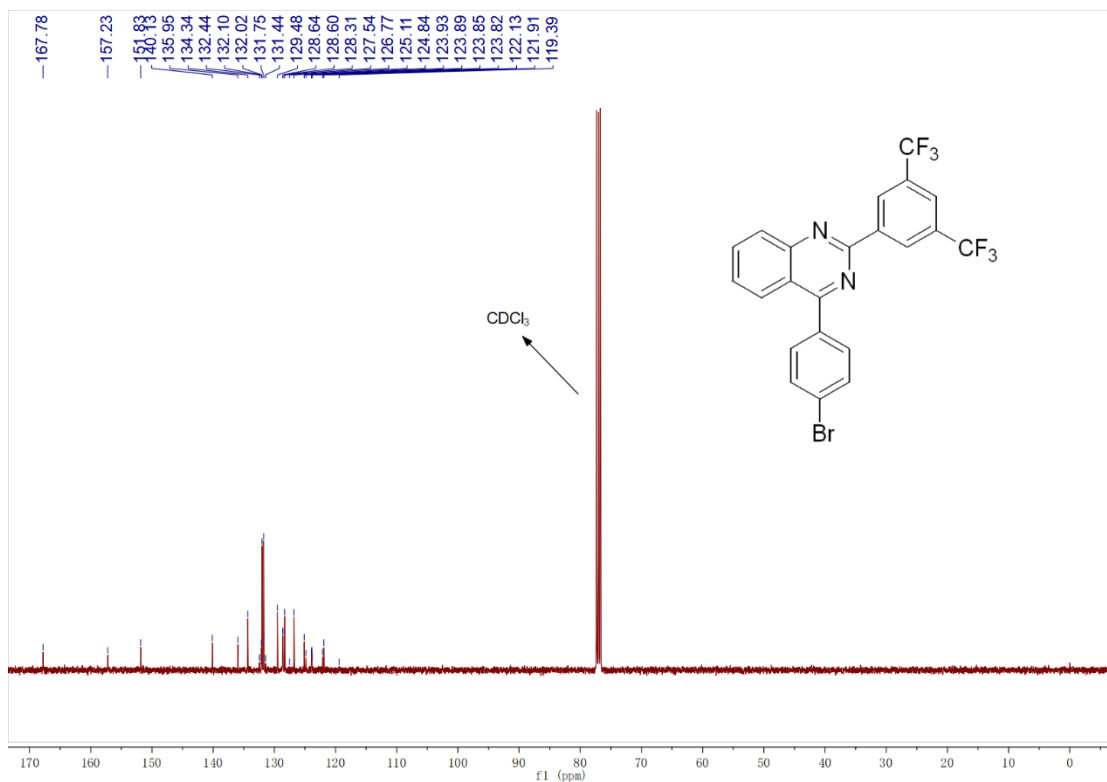

Figure S3 <sup>13</sup>C NMR of A in CDCl<sub>3</sub>

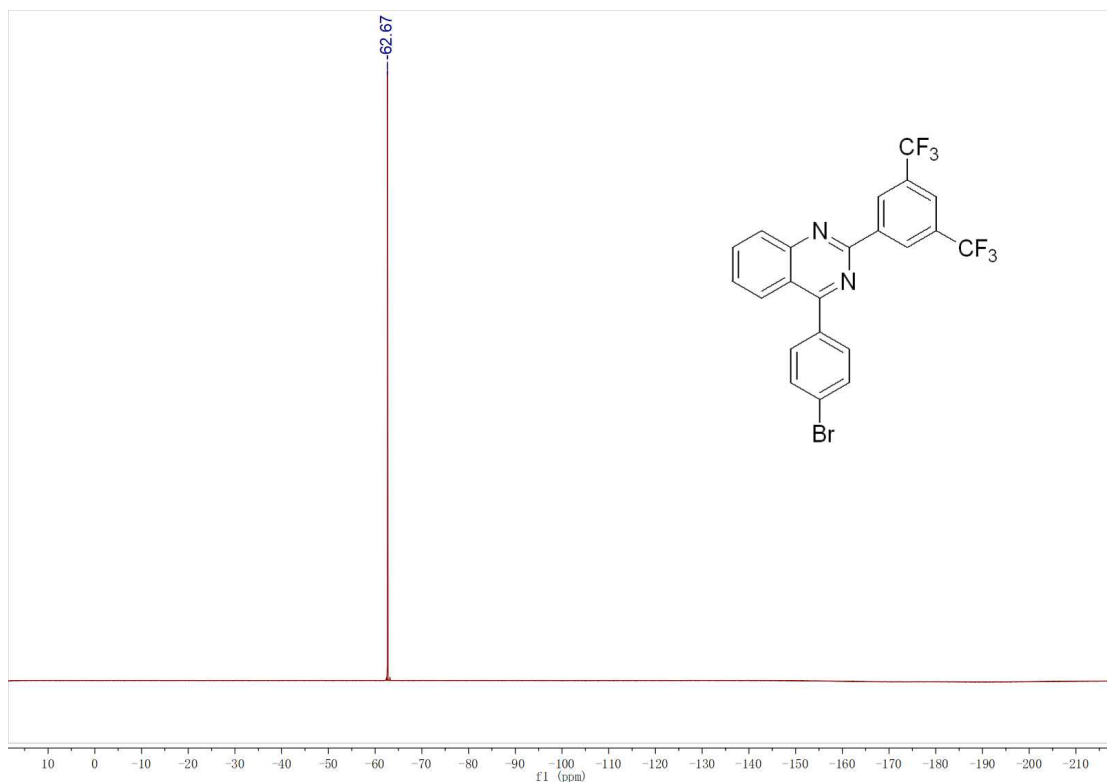

**Figure S4**  $^{19}\text{F}$  NMR of **A** in  $\text{CDCl}_3$

Quinazoline **B**:  $^1\text{H}$  NMR (400 MHz, Chloroform-*d*)  $\delta$  9.16 (s, 2H), 8.21 (s, 1H), 8.11 (d,  $J = 8.9$  Hz, 1H), 8.01 (s, 1H), 7.91 – 7.82 (m, 2H), 7.71 – 7.60 (m, 3H), 7.57 (d,  $J = 11.0$  Hz, 1H).  $^{13}\text{C}$  NMR (101 MHz,  $\text{CDCl}_3$ )  $\delta$  168.9, 158.1, 152.4, 140.5, 139.9, 136.7, 131.9 (q,  $J = 33.4$  Hz), 130.6, 130.1, 129.1, 128.8, 128.7, 128.7, 128.3, 124.0, 123.4 (q,  $J = 272.9$  Hz), 120.5.  $^{19}\text{F}$  NMR (376 MHz,  $\text{CDCl}_3$ )  $\delta$  -62.72.

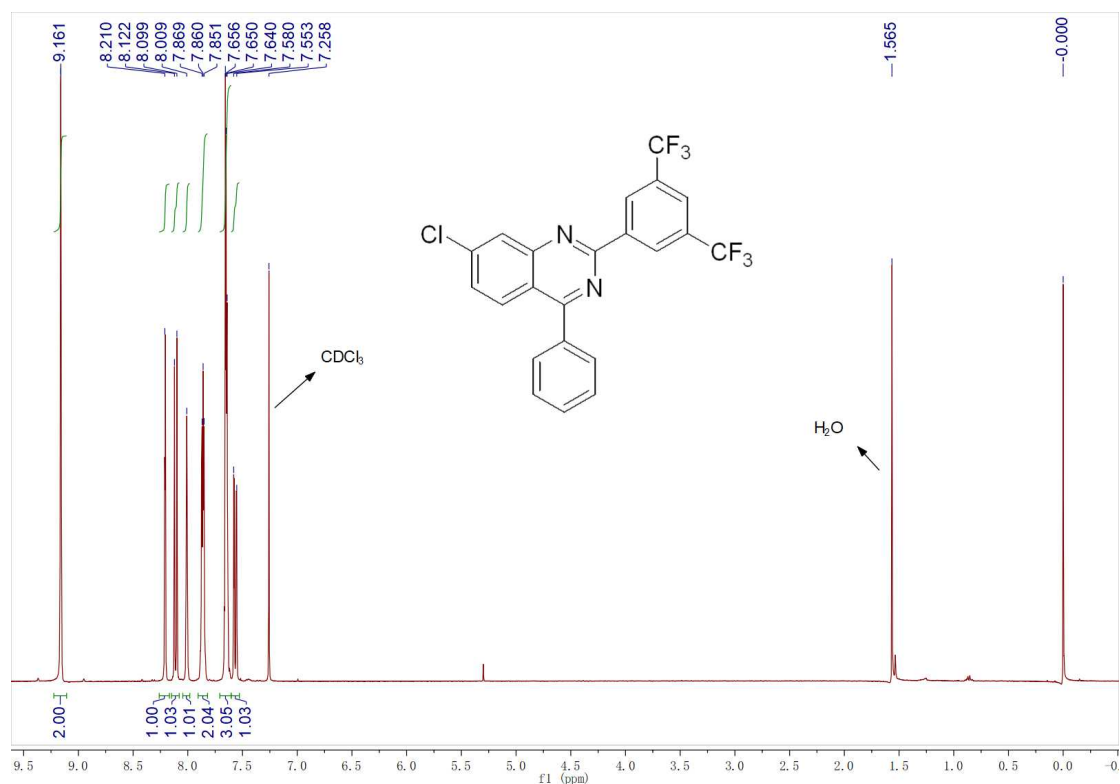

Figure S5 <sup>1</sup>H NMR of B in CDCl<sub>3</sub>

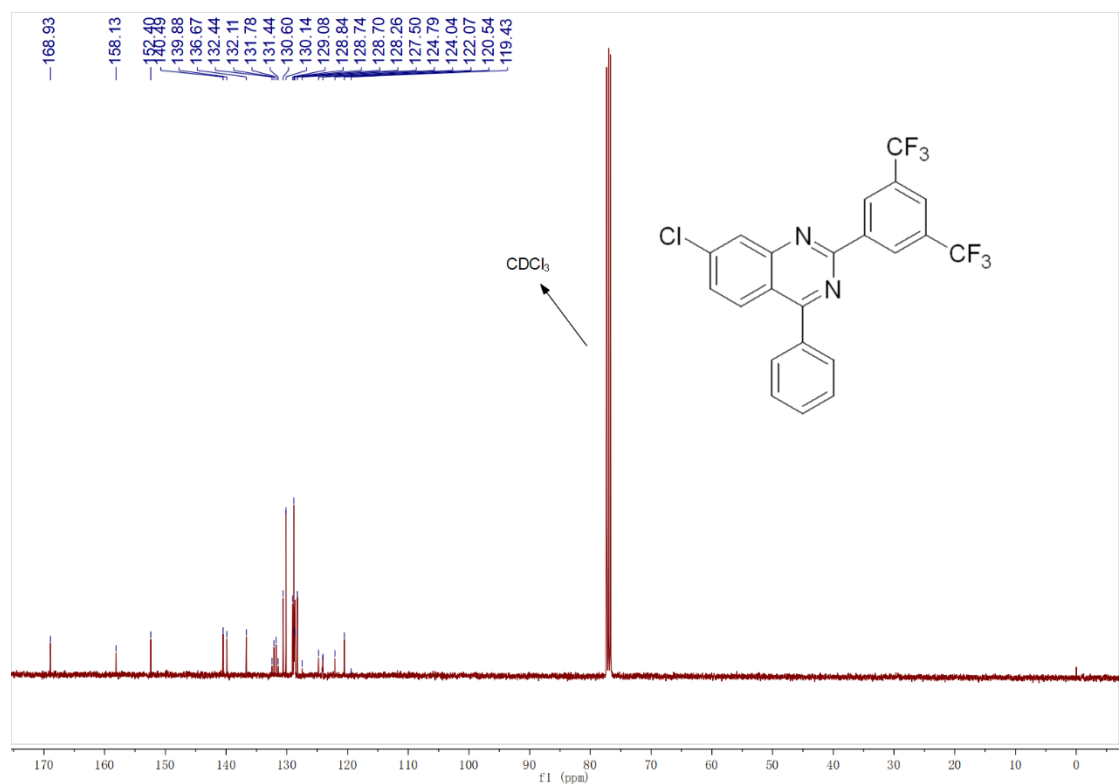

Figure S6 <sup>13</sup>C NMR of B in CDCl<sub>3</sub>

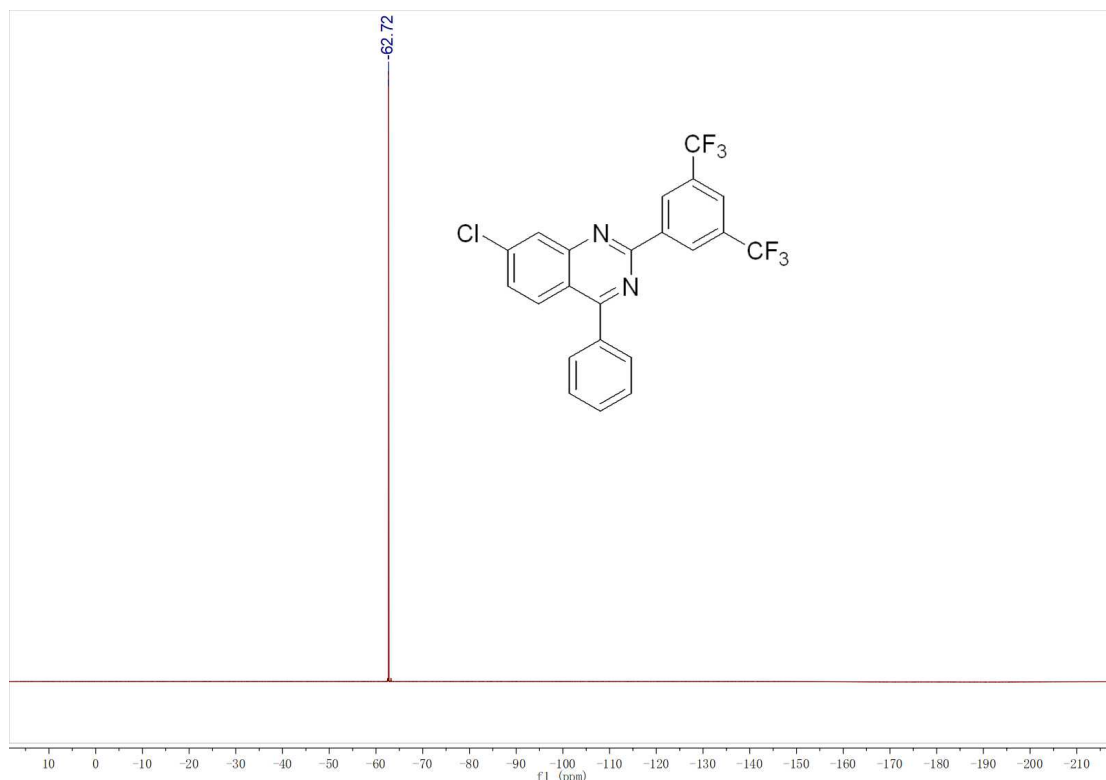

**Figure S7**  $^{19}\text{F}$  NMR of **B** in  $\text{CDCl}_3$

## 2. Synthesis of the target molecules (**1-10**)

The target molecules (**1-10**) were synthesized according to Buchwald-Hartwig coupling.

The quinazoline A or B (100 mg, 1equiv) was added into the schrenk tube (25mL). Then the aromatic secondary amine (1.2equiv),  $\text{Pd}_2(\text{dba})_3$  (0.1equiv),  $(t\text{-Bu})_3\text{PH}^+\text{BF}_4^-$  (0.3equiv) and  $t\text{-BuONa}$  (2equiv) were added. After replacing the air with  $\text{N}_2$ , toluene was added to dissolve the reactants. The mixture was stirred and refluxed for 24h under  $\text{N}_2$ . After cooling to room temperature, the solvent was removed via vacuum. The residue was purified by flash column chromatography with petroleum ether: DCM = 4:1 to 1:2, which depends on different kinds of amine, to afford the desired products 1-10.

**Compound 1:** DCM: PE = 1:4 as eluent, light cyan solid, yield 86.2%, mp 267-268 °C.  $^1\text{H}$  NMR (400 MHz,  $\text{CDCl}_3$ )  $\delta$  9.25 (s, 2H), 8.34 (d,  $J = 8.3$  Hz, 1H), 8.27 (d,  $J = 8.4$  Hz, 1H), 8.18 (m, 4H), 8.02 (d,  $J = 10.6$  Hz, 2H), 7.89 (d,  $J = 8.3$  Hz, 2H), 7.73 (m, 1H), 7.63 (d,  $J = 8.2$  Hz, 2H), 7.49 (m, 2H), 7.35 (m, 2H).  $^{13}\text{C}$  NMR (101 MHz,  $\text{CDCl}_3$ )  $\delta$  167.9, 157.4, 152.0, 140.6, 140.3, 139.9, 135.8, 134.4, 132.0 (q,  $J = 33.2$  Hz), 131.9, 129.6, 128.7, 128.4, 127.0, 126.2, 124.0, 123.8, 123.6 (q,  $J = 273.1$  Hz), 122.1, 120.5, 109.9.  $^{19}\text{F}$  NMR (376 MHz,  $\text{CDCl}_3$ )  $\delta$  -62.60. HRMS (Maldi-TOF): calcd. for  $\text{C}_{34}\text{H}_{19}\text{F}_6\text{N}_3$   $[\text{M}+\text{H}]^+$ , 583.1483; found: 583.1478. IR: 3084, 3062, 1607, 1451, 1311, 1277, 1174, 1126, 842, 774, 682.



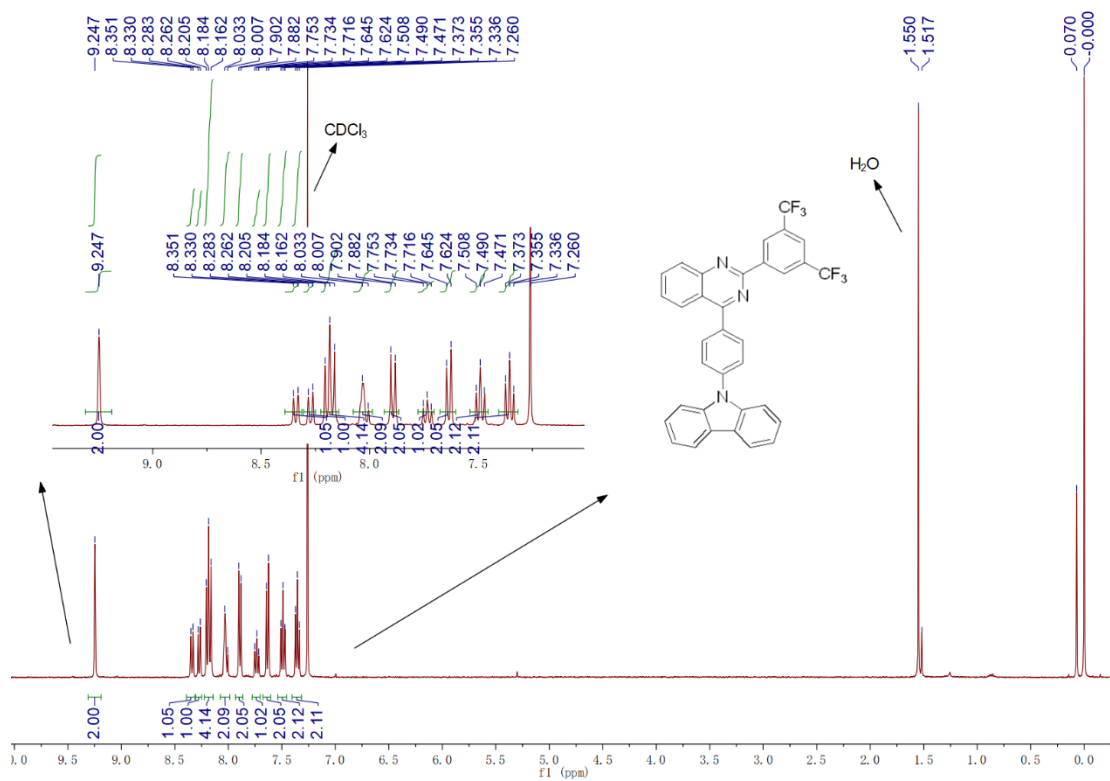

**Figure 8**  $^1\text{H}$  NMR of **1** in  $\text{CDCl}_3$

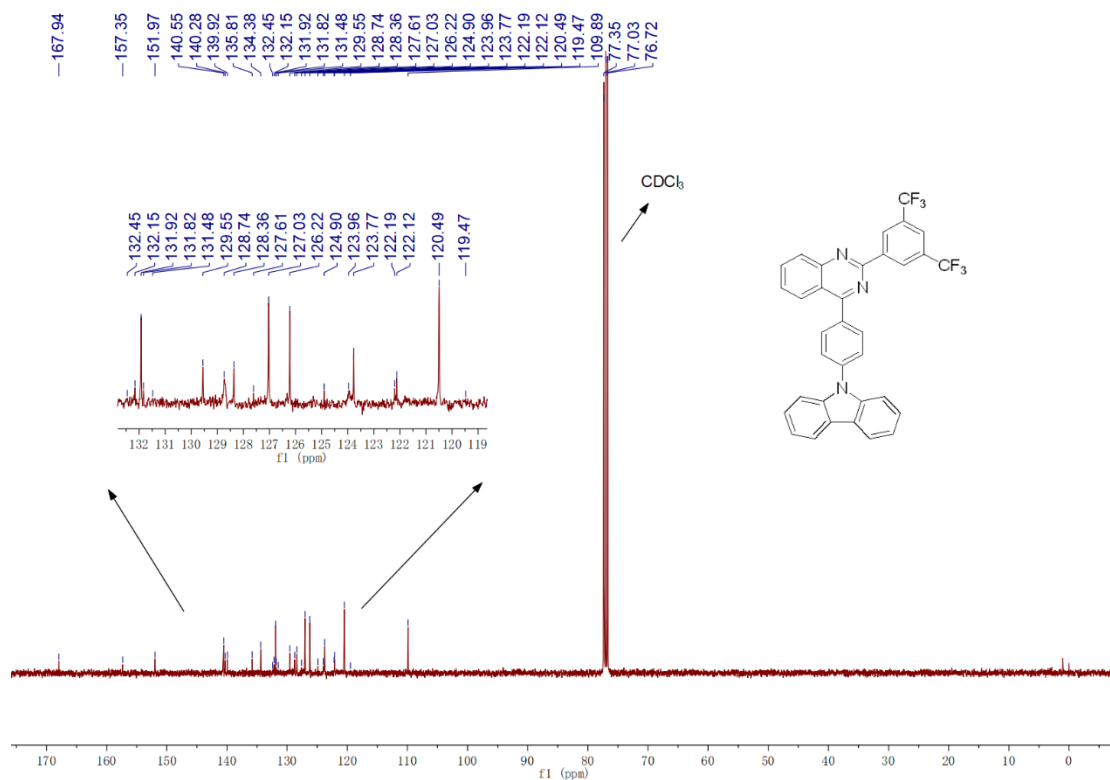

**Figure S9**  $^{13}\text{C}$  NMR of **1** in  $\text{CDCl}_3$

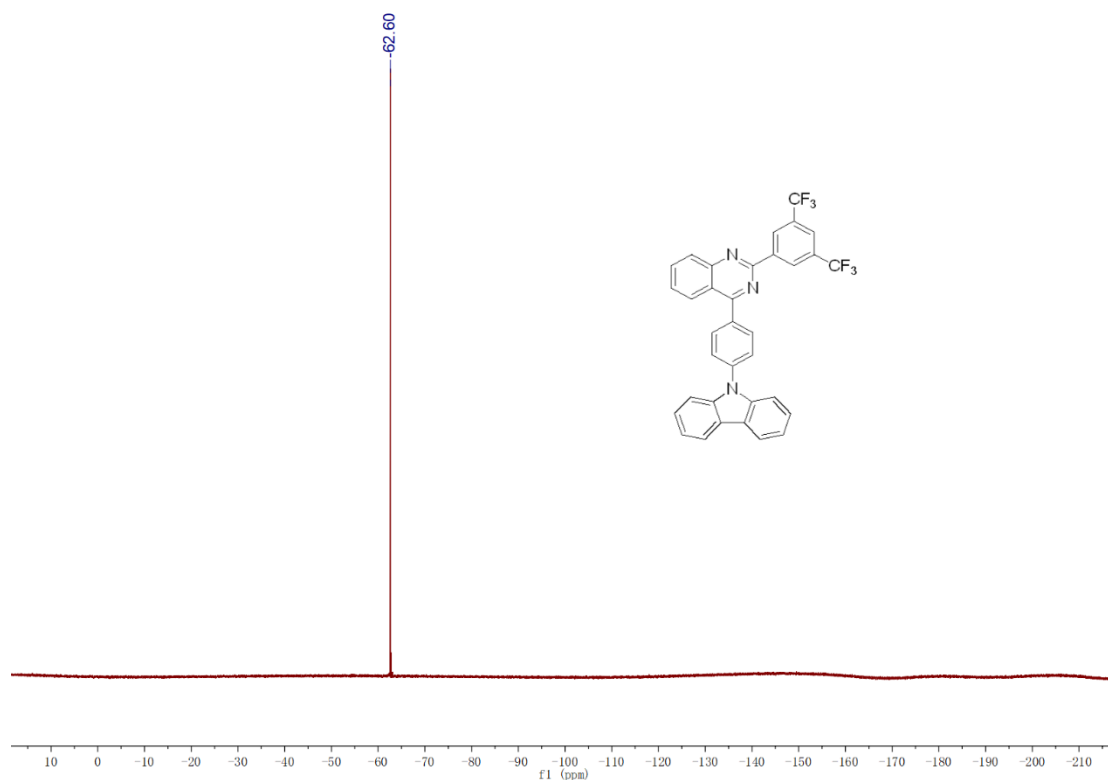

**Figure 10**  $^{19}\text{F}$  NMR of **1** in  $\text{CDCl}_3$

**Compound 2:** DCM:PE=1:4 as eluent, green yellow solid, yield 97.2%, mp 197-198 °C.  $^1\text{H}$  NMR (400 MHz,  $\text{CDCl}_3$ )  $\delta$  9.19 (s, 2H), 8.30 (d,  $J = 8.3$  Hz, 1H), 8.18 (d,  $J = 8.4$  Hz, 1H), 7.99 (s, 1H), 7.94 (m, 1H), 7.82 (d,  $J = 8.6$  Hz, 2H), 7.64 (m, 1H), 7.36 (m, 4H), 7.24 (d,  $J = 9.4$  Hz, 6H), 7.14 (m, 2H).  $^{13}\text{C}$  NMR (101 MHz,  $\text{CDCl}_3$ )  $\delta$  168.1, 157.2, 151.9, 150.3, 147.0, 140.5, 133.9, 131.8 (q,  $J = 33.2$  Hz), 131.6, 129.6, 129.3, 128.7, 127.8, 127.4, 125.6, 123.7, 123.6 (q,  $J = 272.6$  Hz), 122.0, 121.4.  $^{19}\text{F}$  NMR (376 MHz,  $\text{CDCl}_3$ )  $\delta$  -62.62. HRMS (Maldi-TOF): calcd. for  $\text{C}_{34}\text{H}_{21}\text{F}_6\text{N}_3[\text{M}+\text{H}]^+$ ,

585.1640; found: 585.1635. IR:3058, 3037, 1591, 1491, 1313, 1286, 1172, 1132, 700, 682.

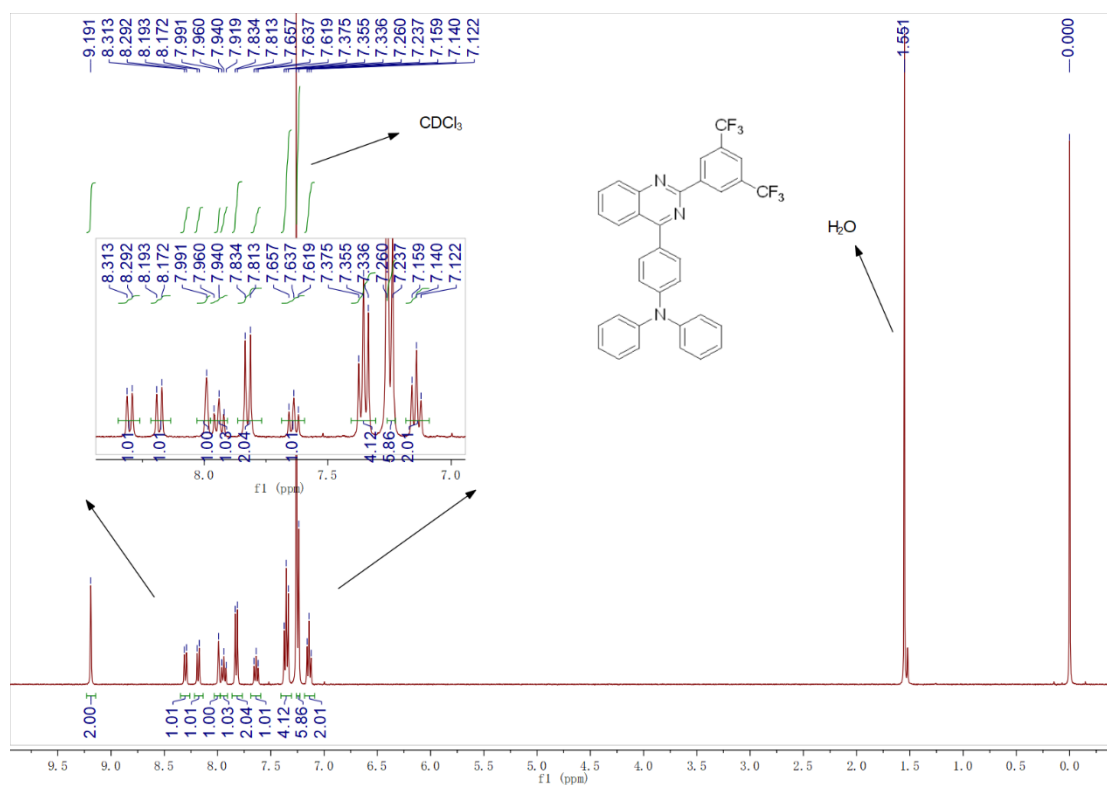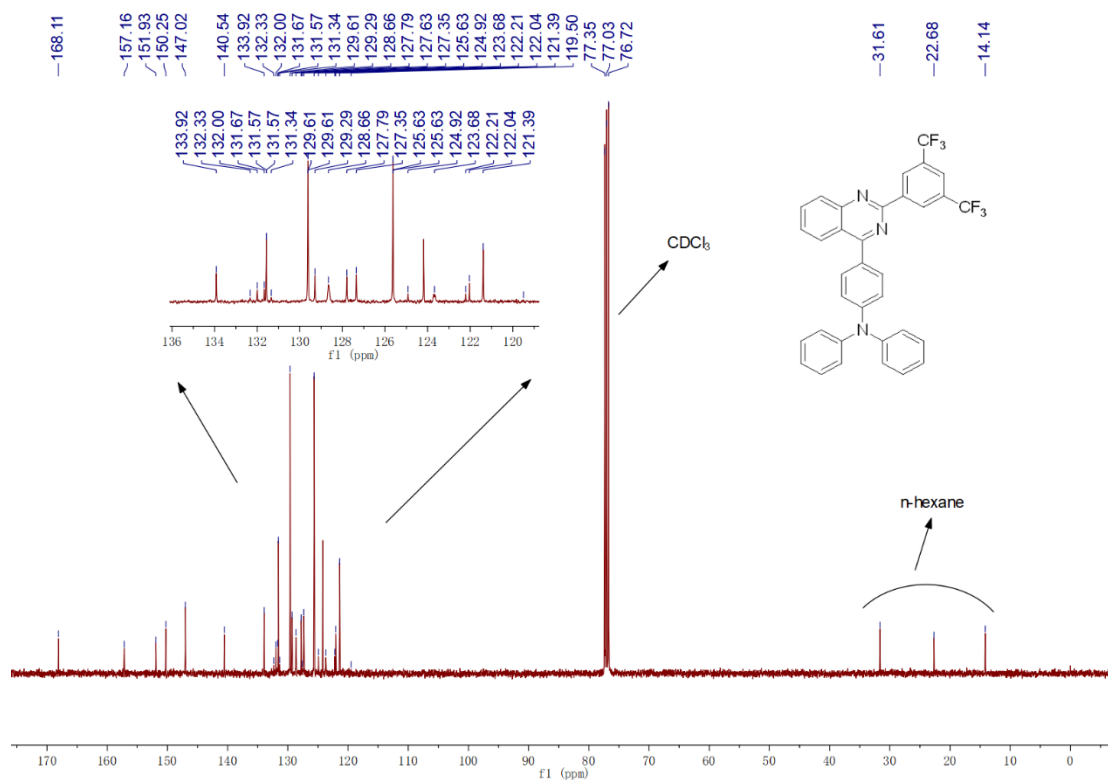

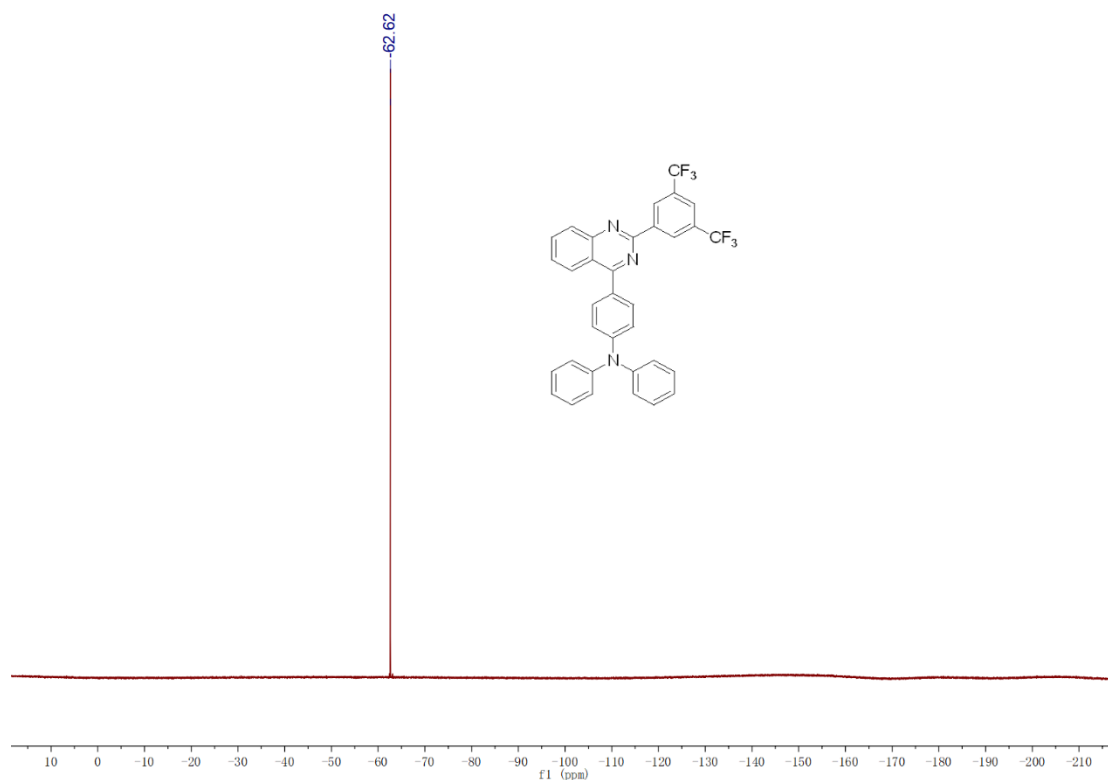

**Figure S13**  $^{19}\text{F}$  NMR of **2** in  $\text{CDCl}_3$

**Compound 3:** DCM:PE=1:4 as eluent, orange solid, yield 94.7%, mp 190-191°C.  $^1\text{H}$  NMR (400 MHz,  $\text{CDCl}_3$ )  $\delta$  9.19 (s, 2H), 8.33 – 8.26 (m, 1H), 8.16 (d,  $J$  = 8.3 Hz, 1H), 7.98 (s, 1H), 7.92 (m, 1H), 7.79 (d,  $J$  = 8.7 Hz, 2H), 7.61 (m, 1H), 7.20 (d,  $J$  = 8.9 Hz, 4H), 7.08 (d,  $J$  = 8.7 Hz, 2H), 6.92 (d,  $J$  = 8.9 Hz, 4H), 3.83 (s, 6H).  $^{13}\text{C}$  NMR (101 MHz,  $\text{CDCl}_3$ )  $\delta$  168.2, 157.1, 156.8, 151.9, 151.1, 140.6, 139.8, 133.8, 131.8 (q,  $J$  = 33.5 Hz), 131.6, 129.2, 128.6, 127.7, 127.4, 123.6 (q,  $J$  = 273.5 Hz), 123.6, 122.0, 118.4, 115.0, 55.5.  $^{19}\text{F}$  NMR (376 MHz,  $\text{CDCl}_3$ )  $\delta$  -62.62. HRMS (Maldi-TOF): calcd. for  $\text{C}_{36}\text{H}_{25}\text{F}_6\text{N}_3\text{O}_2[\text{M}+\text{H}]^+$ , 645.1851; found: 645.1848. IR: 2942, 2830, 1601, 1505, 1279, 1244, 1173, 1133, 829, 700, 682.

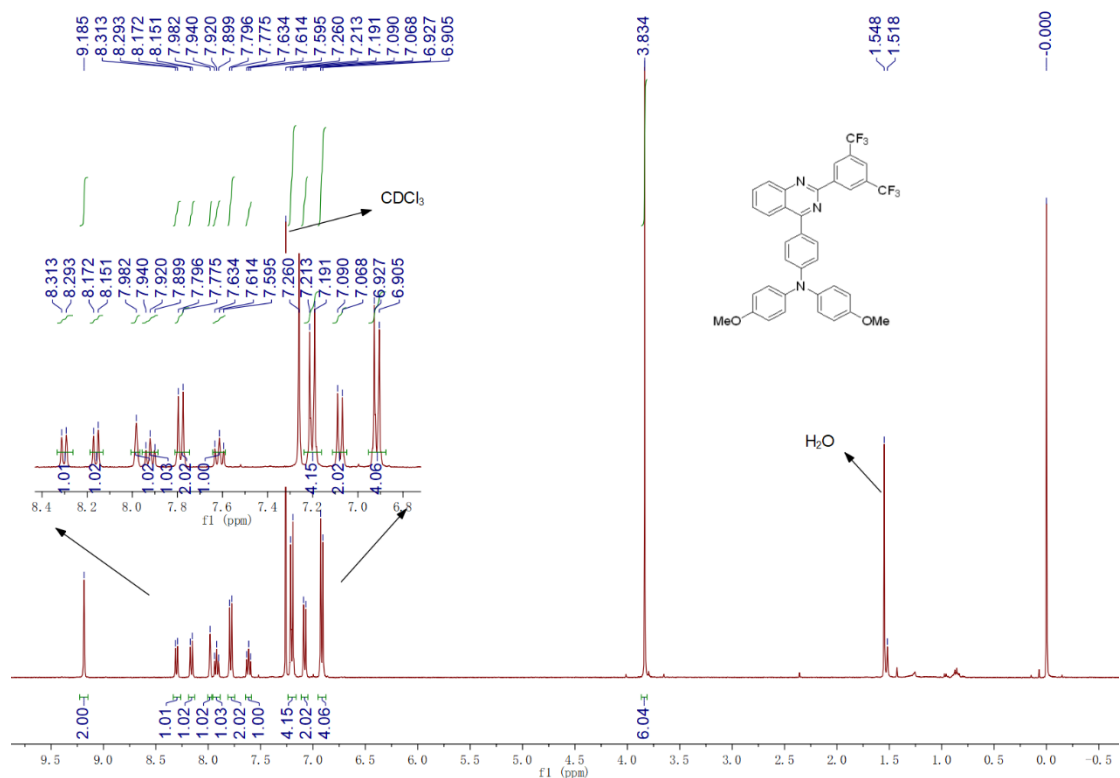

**Figure 14**  $^1\text{H}$  NMR of **3** in  $\text{CDCl}_3$

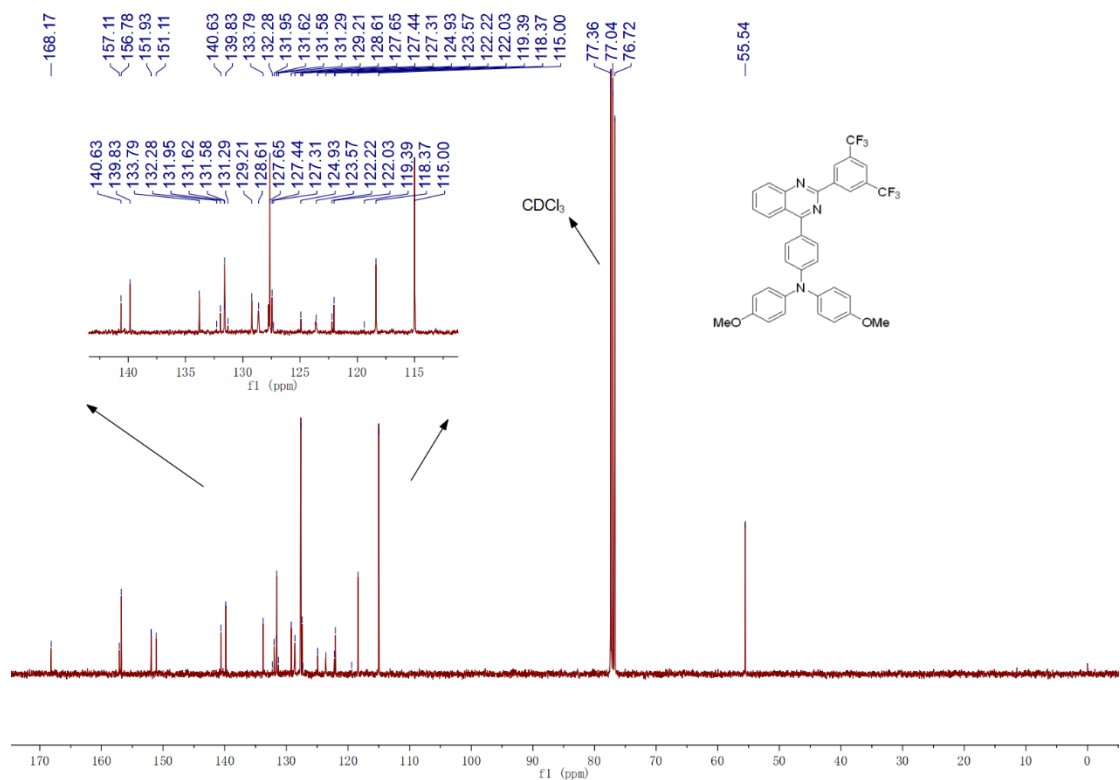

**Figure S15**  $^{13}\text{C}$  NMR of **3** in  $\text{CDCl}_3$

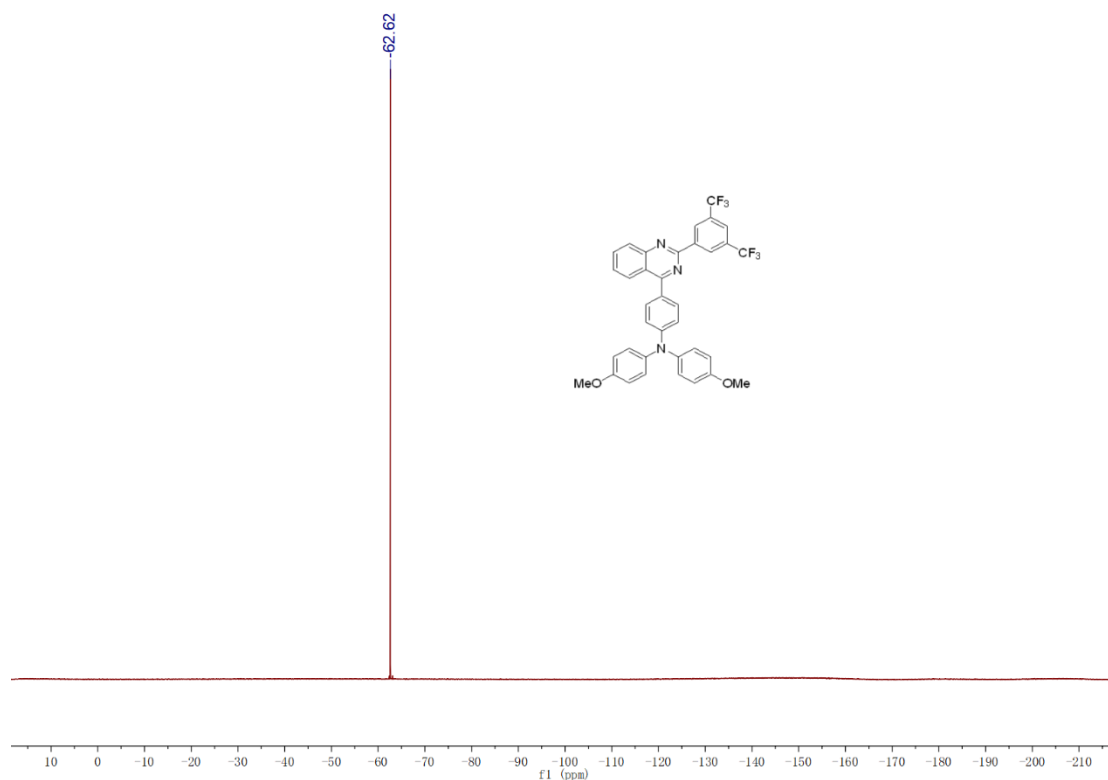

**Figure S16**  $^{19}\text{F}$  NMR of **3** in  $\text{CDCl}_3$

**Compound 4:** DCM:PE=1:4 as eluent, yellow solid, yield >99%, mp 245-246 °C.  $^1\text{H}$  NMR (400 MHz,  $\text{CDCl}_3$ )  $\delta$  9.23 (s, 2H), 8.26 (d,  $J = 8.6$  Hz, 2H), 8.14 (d,  $J = 8.3$  Hz, 2H), 8.01 (d,  $J = 12.6$  Hz, 2H), 7.72 (m, 1H), 7.64 (d,  $J = 8.3$  Hz, 2H), 6.78 – 6.65 (m, 6H), 6.13 (dd,  $J = 7.4, 1.9$  Hz, 2H).  $^{13}\text{C}$  NMR (101 MHz,  $\text{CDCl}_3$ )  $\delta$  167.9, 157.3, 151.9, 144.1, 141.2, 140.2, 137.1, 134.4, 134.1, 133.0, 132.0 (q,  $J = 33.3$  Hz), 131.3, 129.6, 129.1, 128.7, 128.4, 126.9, 123.9, 123.6 (q,  $J = 272.6$  Hz), 123.4, 122.0, 121.8, 115.7, 113.5.  $^{19}\text{F}$  NMR (376 MHz,  $\text{CDCl}_3$ )  $\delta$  -62.62. HRMS (Maldi-TOF): calcd. for  $\text{C}_{34}\text{H}_{19}\text{F}_6\text{N}_3\text{O}$   $[\text{M}+\text{H}]^+$ , 599.1432; found: 599.1430. IR: 3067, 2920, 1603, 1487, 1315, 1278, 1170, 1134, 744, 701, 682.

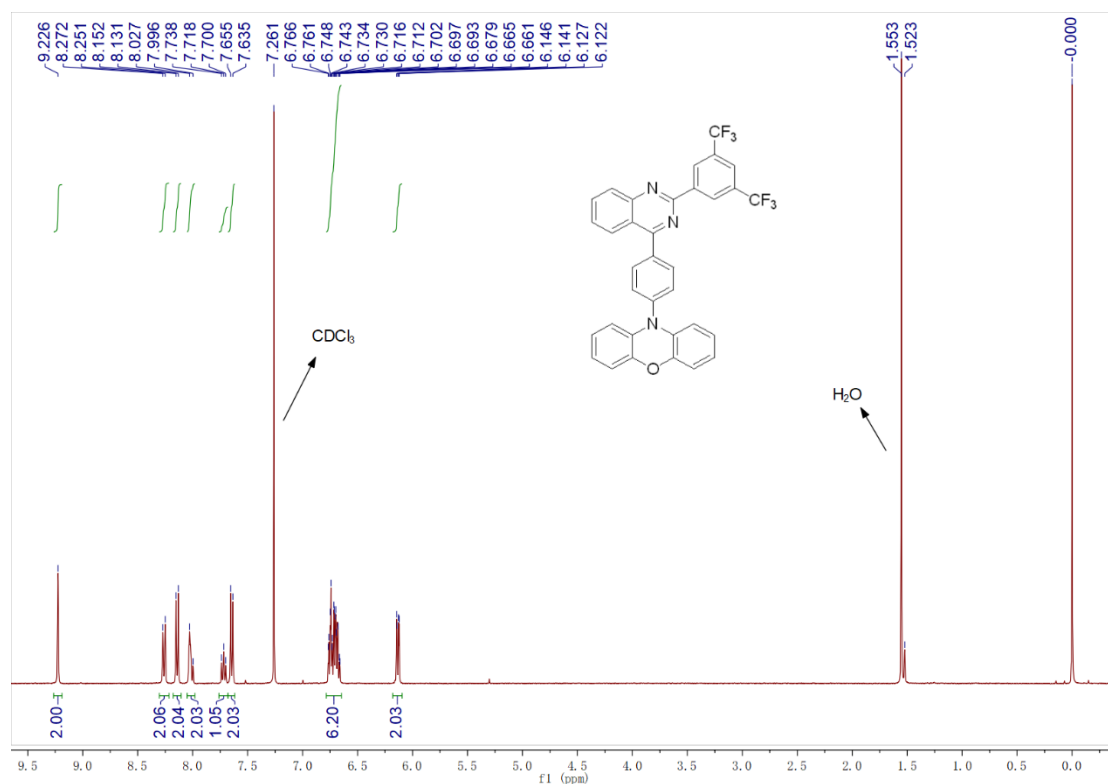

**Figure S17**  $^1\text{H}$  NMR of **4** in  $\text{CDCl}_3$

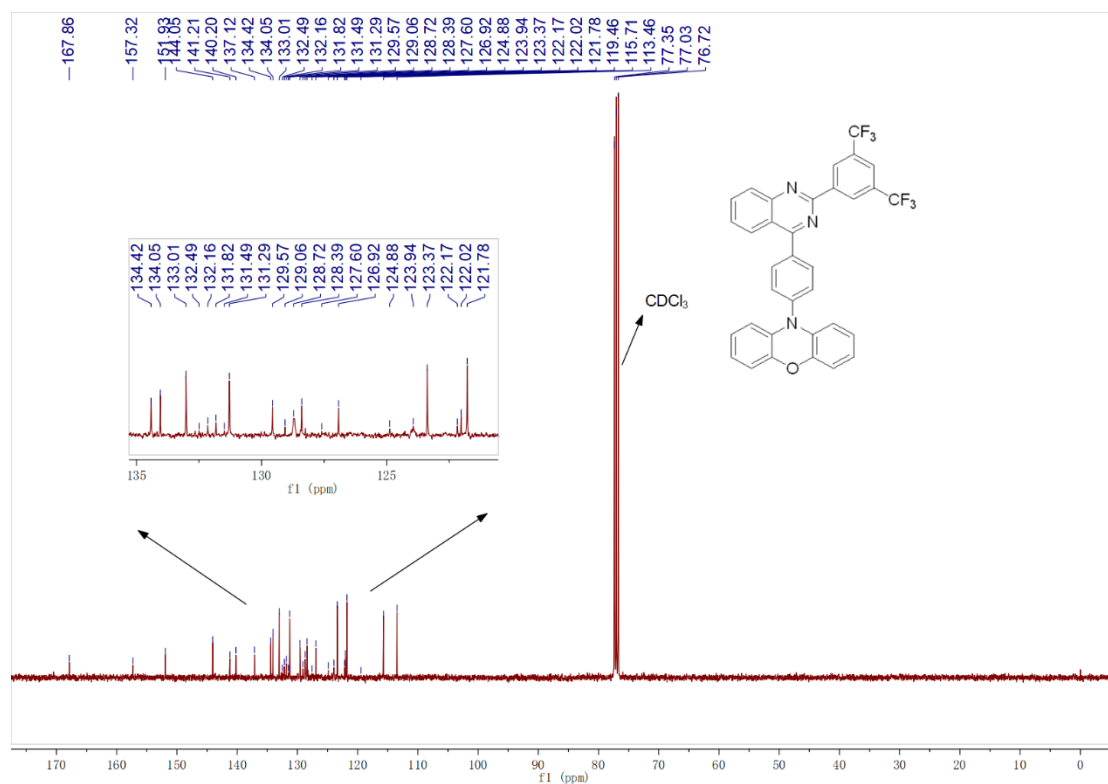

**Figure S18**  $^{13}\text{C}$  NMR of **4** in  $\text{CDCl}_3$

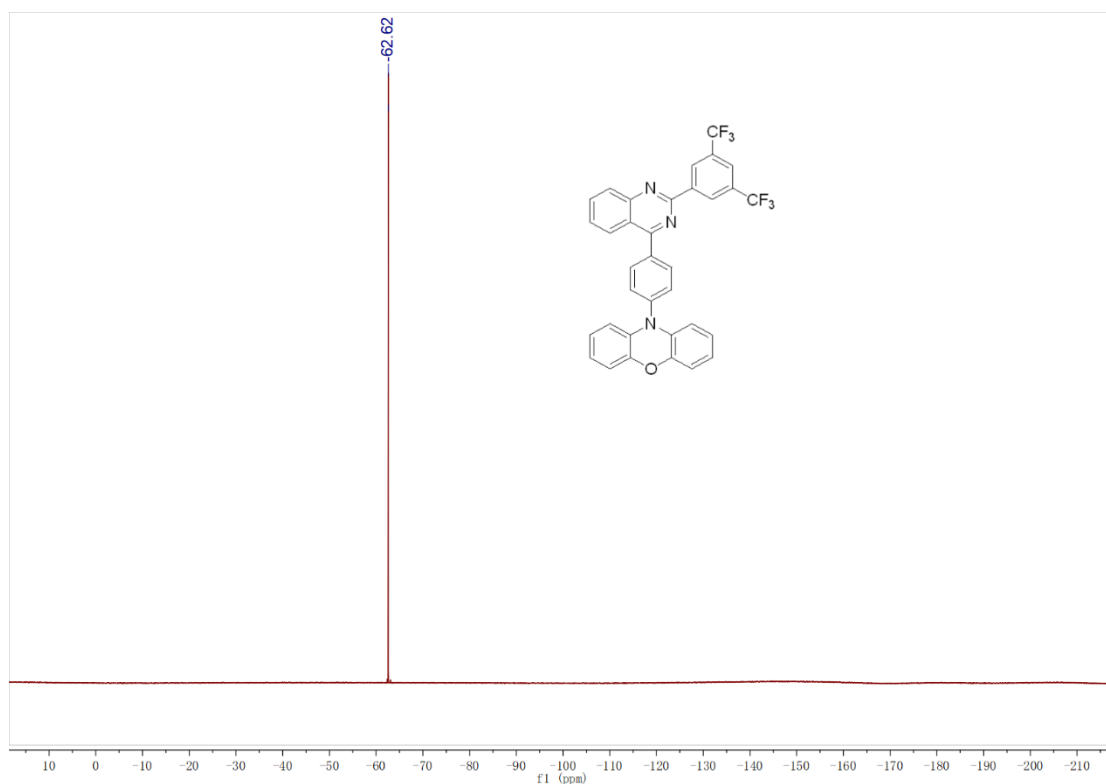

**Figure S19**  $^{19}\text{F}$  NMR of **4** in  $\text{CDCl}_3$

**Compound 5:** DCM:PE=2:1 as eluent, red solid, yield 83.7%, mp 212-213 °C.  $^1\text{H}$  NMR (400 MHz,  $\text{CDCl}_3$ )  $\delta$  9.19 (s, 2H), 8.32 (d,  $J = 8.0$  Hz, 1H), 8.14 (d,  $J = 8.3$  Hz, 1H), 7.97 (s, 1H), 7.90 (m, 1H), 7.77 (s, 2H), 7.59 (m, 1H), 7.17 (s, 6H), 6.75 (s, 4H), 2.97 (s, 12H).  $^{13}\text{C}$  NMR (101 MHz,  $\text{CDCl}_3$ )  $\delta$  157.1, 151.9, 140.7, 133.7, 131.7 (q,  $J = 33.6$  Hz), 129.1, 128.6, 127.6, 127.5, 123.6 (q,  $J = 272.9$  Hz), 123.5, 122.0, 113.7.  $^{19}\text{F}$  NMR (376 MHz,  $\text{CDCl}_3$ )  $\delta$  -62.61. HRMS (Maldi-TOF): calcd. for  $\text{C}_{38}\text{H}_{31}\text{F}_6\text{N}_5$   $[\text{M}+\text{H}]^+$ , 671.2484; found: 671.2482. IR: 3032, 2882, 1600, 1513, 1385, 1286, 1171, 1132, 812, 770, 683.



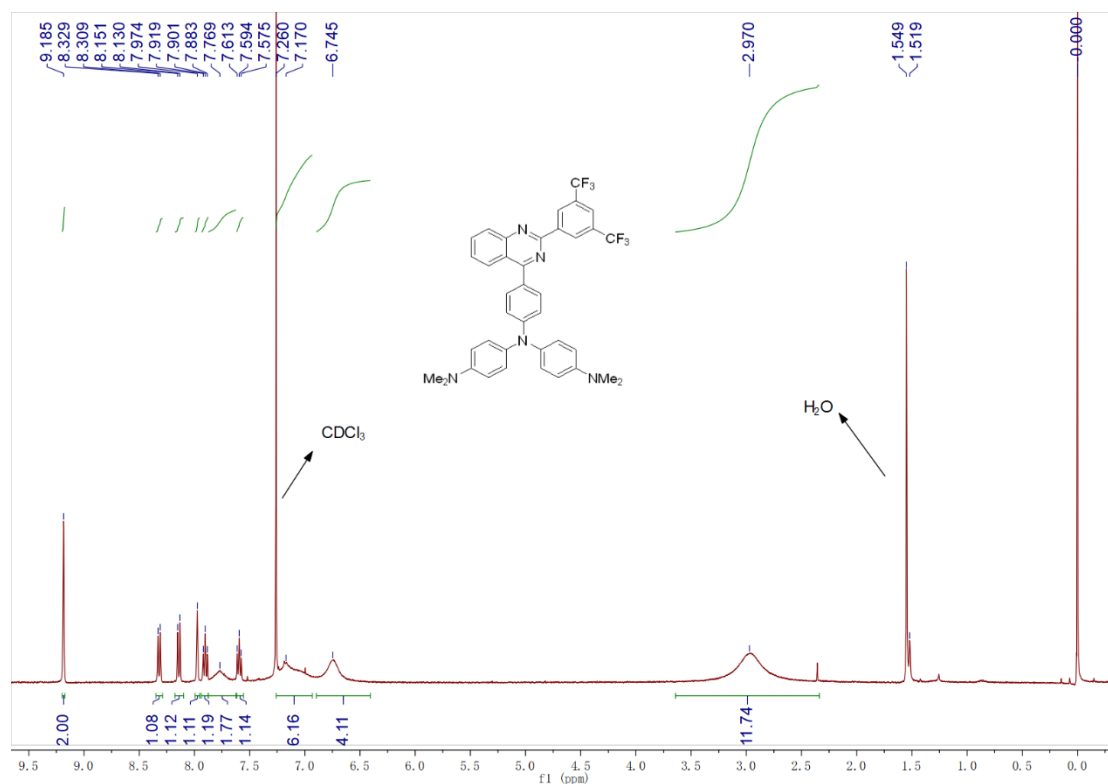

Figure S20 <sup>1</sup>H NMR of 5 in CDCl<sub>3</sub>

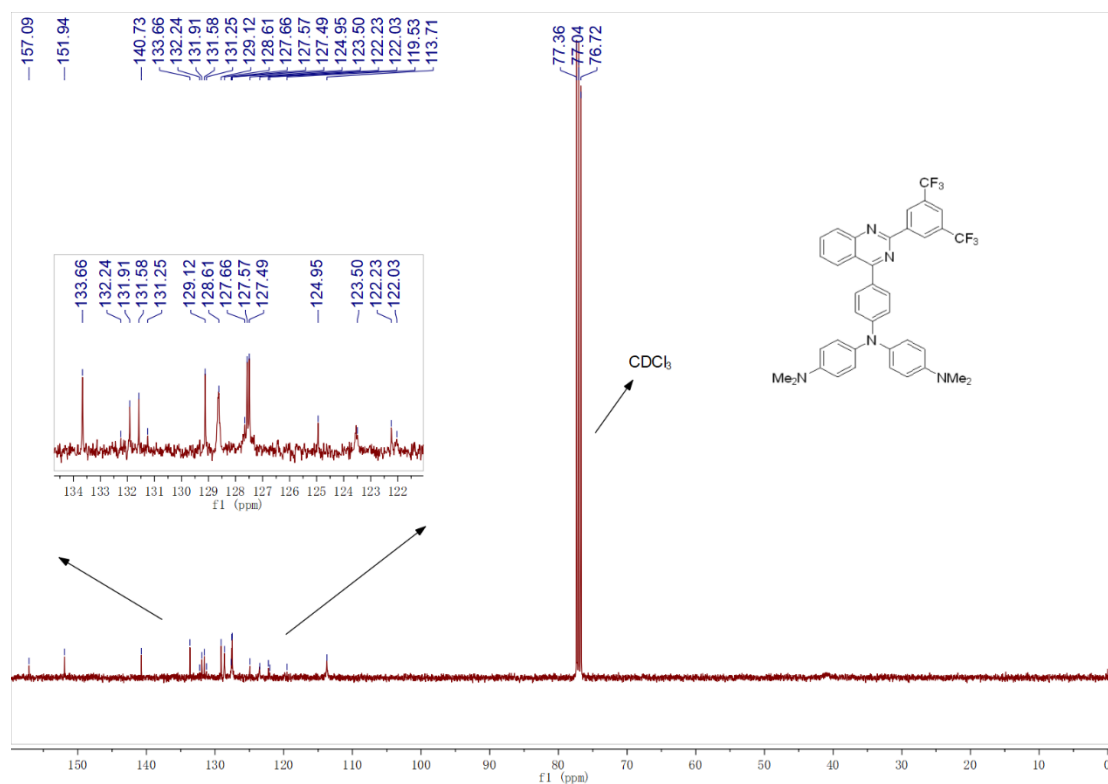

Figure S21 <sup>13</sup>C NMR of 5 in CDCl<sub>3</sub>

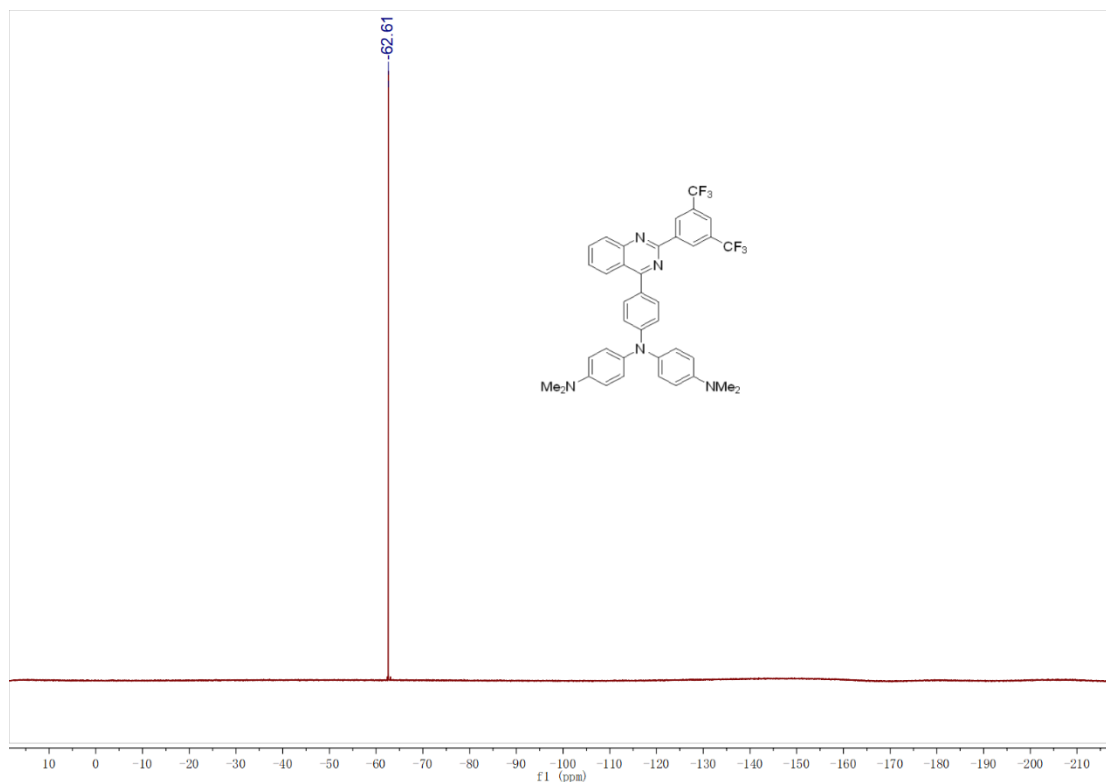

**Figure S22**  $^{19}\text{F}$  NMR of **5** in  $\text{CDCl}_3$

**Compound 6:** DCM:PE=1:4 as eluent, light cyan solid, yield 86.6%, mp 304-305 °C.  $^1\text{H}$  NMR (400 MHz,  $\text{CDCl}_3$ )  $\delta$  9.23 (s, 2H), 8.45 (d,  $J = 1.9$  Hz, 1H), 8.41 (d,  $J = 8.9$  Hz, 1H), 8.19 (d,  $J = 7.7$  Hz, 2H), 8.03 (s, 1H), 7.98 (dd,  $J = 6.5, 3.1$  Hz, 2H), 7.93 (dd,  $J = 8.9, 2.1$  Hz, 1H), 7.68 (dd,  $J = 5.3, 3.1$  Hz, 5H), 7.49 (m, 2H), 7.38 (m, 2H).  $^{13}\text{C}$  NMR (101 MHz,  $\text{CDCl}_3$ )  $\delta$  168.8, 158.2, 153.1, 143.2, 140.1, 136.9, 132.0 (q,  $J = 33.5$  Hz), 130.6, 130.2, 129.2, 128.9, 126.7, 126.5, 125.1, 123.5 (q,  $J = 273.2$  Hz), 124.2, 124.1, 121.1, 120.7, 120.6, 116.9, 109.9.  $^{19}\text{F}$  NMR (376 MHz,  $\text{CDCl}_3$ )  $\delta$  -62.64. HRMS (Maldi-TOF): calcd. for  $\text{C}_{34}\text{H}_{19}\text{F}_6\text{N}_3$   $[\text{M}+\text{H}]^+$ , 583.1483; found: 583.1479. IR: 3075, 2925, 1615, 1493, 1448, 1327, 1281, 1130, 748, 723, 701, 682.

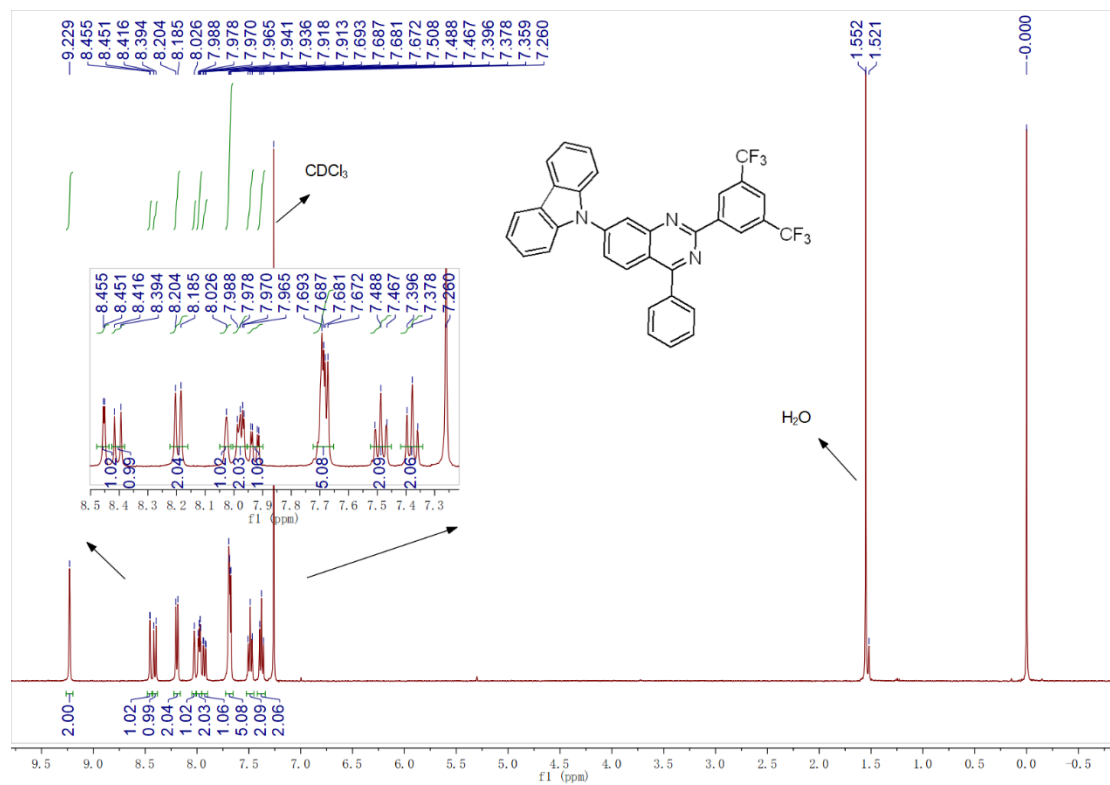

**Figure S23**  $^1\text{H}$  NMR of **6** in  $\text{CDCl}_3$

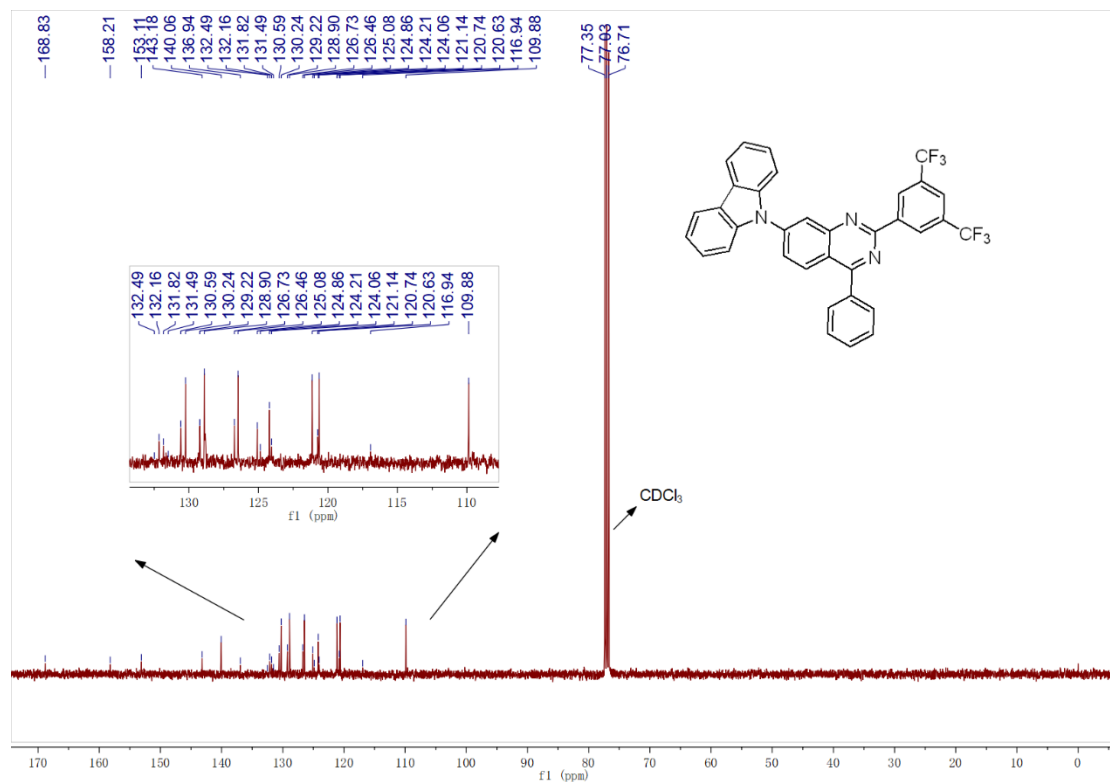

**Figure S24**  $^{13}\text{C}$  NMR of **6** in  $\text{CDCl}_3$

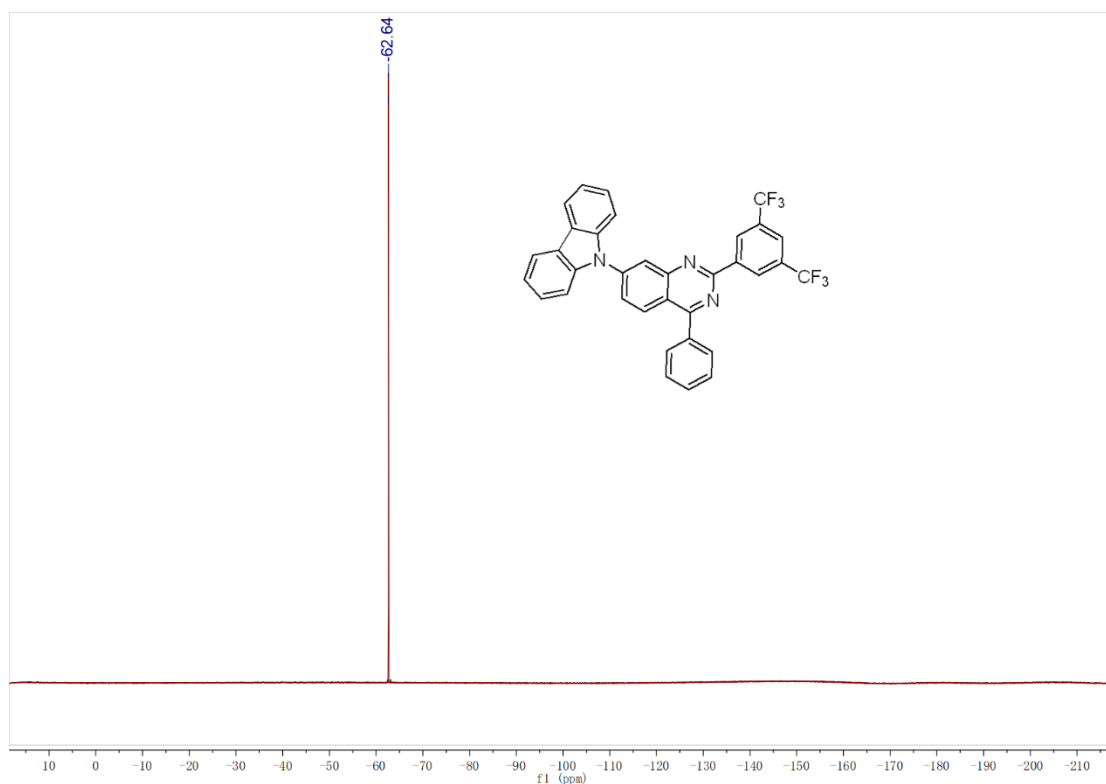

**Figure S25**  $^{19}\text{F}$  NMR of **6** in  $\text{CDCl}_3$

**Compound 7:** DCM:PE=1:4 as eluent, yellow solid, yield 97.7%, mp 278-279 °C.  $^1\text{H}$  NMR (400 MHz,  $\text{CDCl}_3$ )  $\delta$  9.09 (s, 2H), 7.95 (s, 1H), 7.92 (d,  $J = 9.3$  Hz, 1H), 7.86 (dd,  $J = 6.6, 3.0$  Hz, 2H), 7.63 – 7.55 (m, 3H), 7.46 (d,  $J = 2.3$  Hz, 1H), 7.40 (m, 4H), 7.30 (d,  $J = 2.4$  Hz, 1H), 7.27 (s, 3H), 7.22 (d,  $J = 7.3$  Hz, 3H).  $^{13}\text{C}$  NMR (101 MHz,  $\text{CDCl}_3$ )  $\delta$  167.2, 157.9, 153.6, 152.8, 146.0, 140.7, 137.5, 131.7 (q,  $J = 33.5$  Hz), 130.1, 129.9, 128.6, 127.9, 126.5, 125.5, 123.6 (q,  $J = 273.1$  Hz), 123.5, 122.9, 117.2, 114.4.  $^{19}\text{F}$  NMR (376 MHz,  $\text{CDCl}_3$ )  $\delta$  -62.60. HRMS (Maldi-TOF): calcd. for  $\text{C}_{34}\text{H}_{21}\text{F}_6\text{N}_3$   $[\text{M}+\text{H}]^+$ , 585.1640; found: 585.1639. IR: 3092, 3062, 1595, 1485, 1406, 1326, 1286, 1170, 1131, 753, 700, 683.

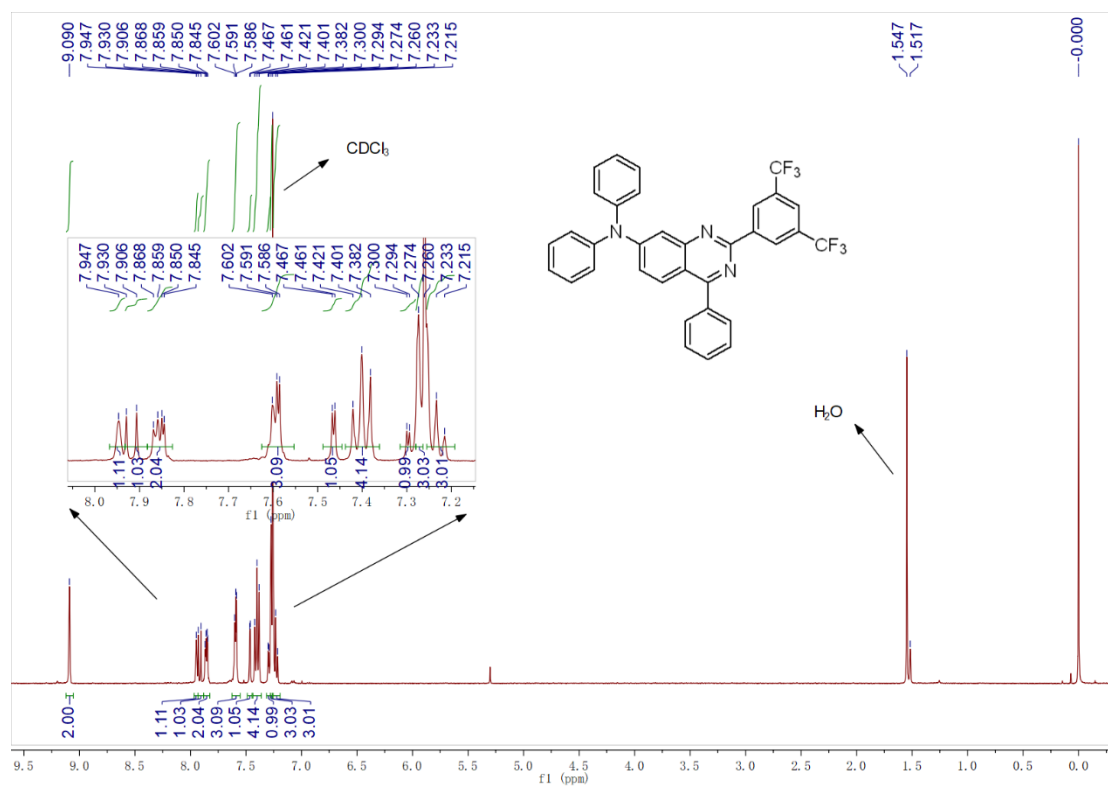

**Figure S26**  $^1\text{H}$  NMR of **7** in  $\text{CDCl}_3$

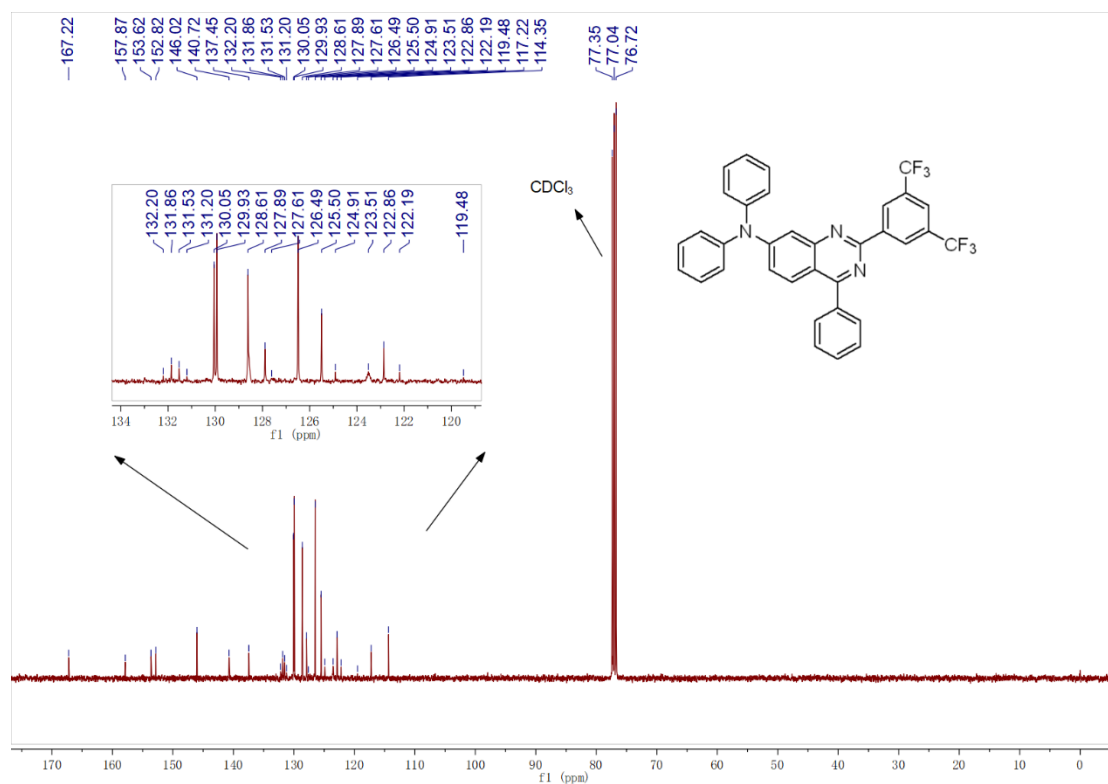

**Figure S27**  $^{13}\text{C}$  NMR of **7** in  $\text{CDCl}_3$

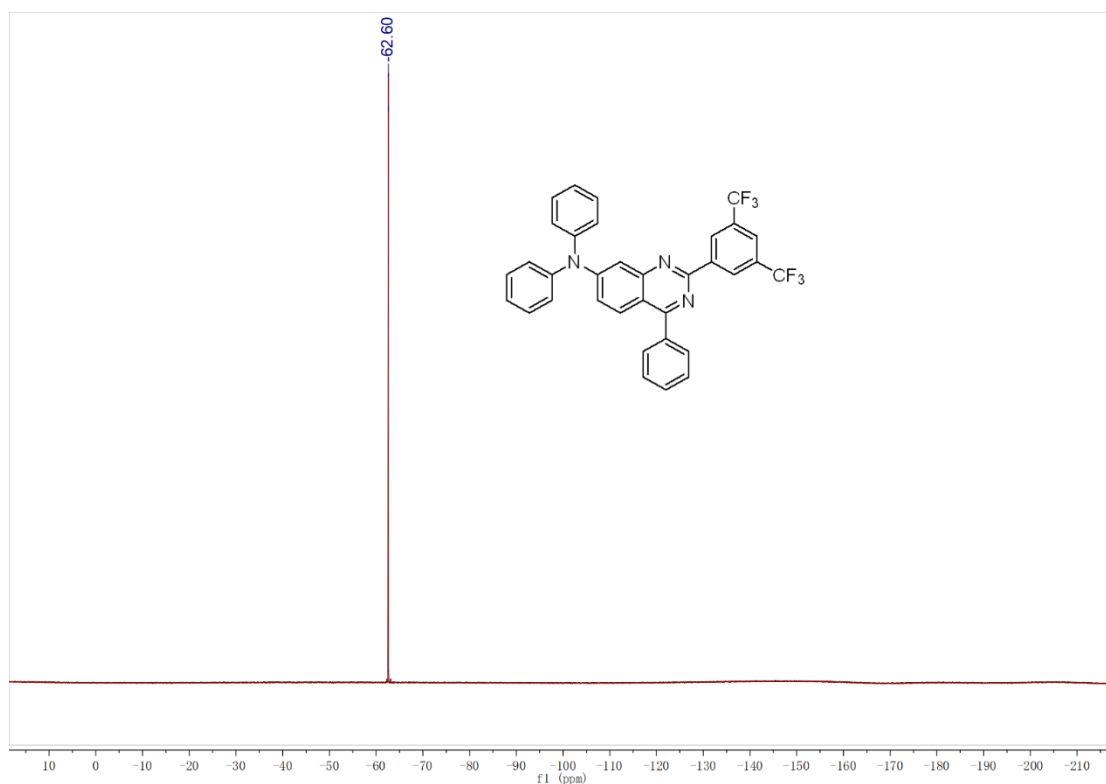

**Figure S28**  $^{19}\text{F}$  NMR of **7** in  $\text{CDCl}_3$

**Compound 8:** DCM:PE=1:2 as eluent, orange solid, yield 86.8%, mp 265–266 °C.  $^1\text{H}$  NMR (400 MHz,  $\text{CDCl}_3$ )  $\delta$  9.09 (s, 2H), 7.94 (s, 1H), 7.89 – 7.81 (m, 3H), 7.62 – 7.55 (m, 3H), 7.27 (d,  $J$  = 2.4 Hz, 1H), 7.22 (d,  $J$  = 8.9 Hz, 4H), 7.17 (dd,  $J$  = 9.3, 2.4 Hz, 1H), 6.95 (d,  $J$  = 8.9 Hz, 4H), 3.85 (s, 6H).  $^{13}\text{C}$  NMR (101 MHz,  $\text{CDCl}_3$ )  $\delta$  166.9, 157.8, 157.6, 153.7, 153.5, 140.9, 138.7, 137.6, 131.6 (q,  $J$  = 33.2 Hz), 130.0, 129.9, 128.6, 128.1, 127.8, 123.6 (q,  $J$  = 272.9 Hz), 123.4, 121.3, 116.4, 115.2, 111.3, 55.56.  $^{19}\text{F}$  NMR (376 MHz,  $\text{CDCl}_3$ )  $\delta$  -62.58. HRMS (Maldi-TOF): cacl. for  $\text{C}_{36}\text{H}_{25}\text{F}_6\text{N}_3\text{O}_2$   $[\text{M}+\text{H}]^+$ , 645.1851; found: 645.1858. IR: 3067, 2994, 1605, 1508, 1484, 1406, 1279, 1245, 1133, 828, 700, 682.

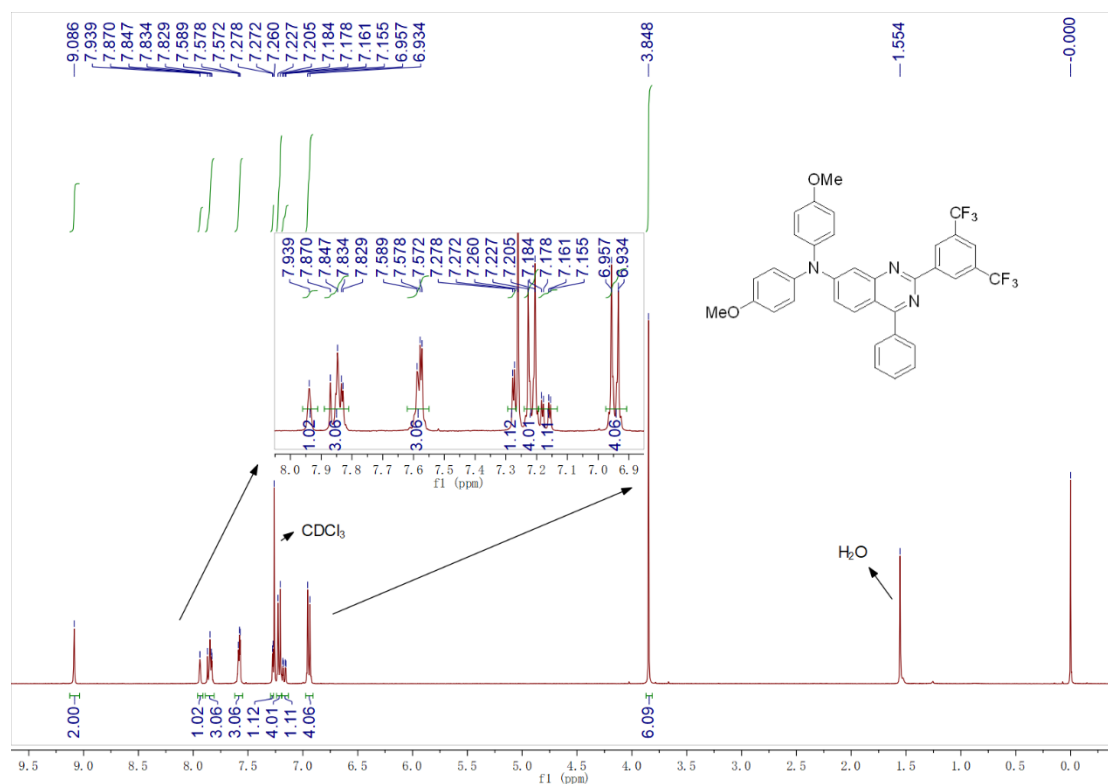

**Figure S29**  $^1\text{H}$  NMR of **8** in  $\text{CDCl}_3$

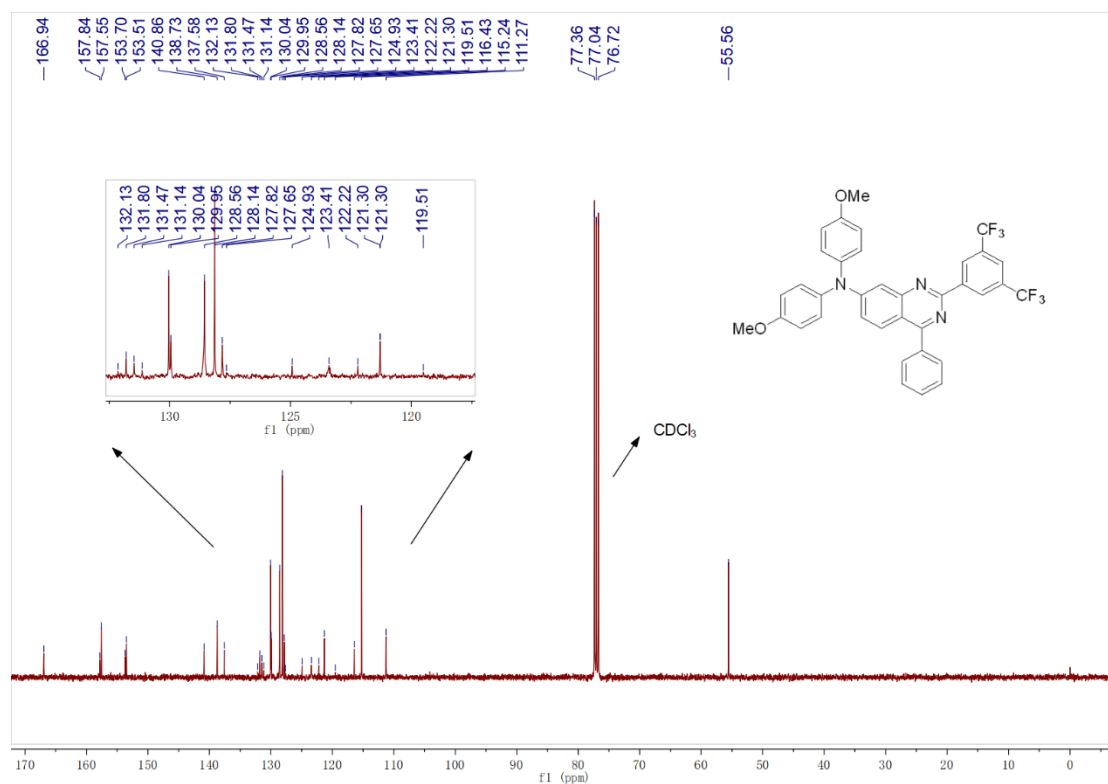

**Figure S30**  $^{13}\text{C}$  NMR of **8** in  $\text{CDCl}_3$

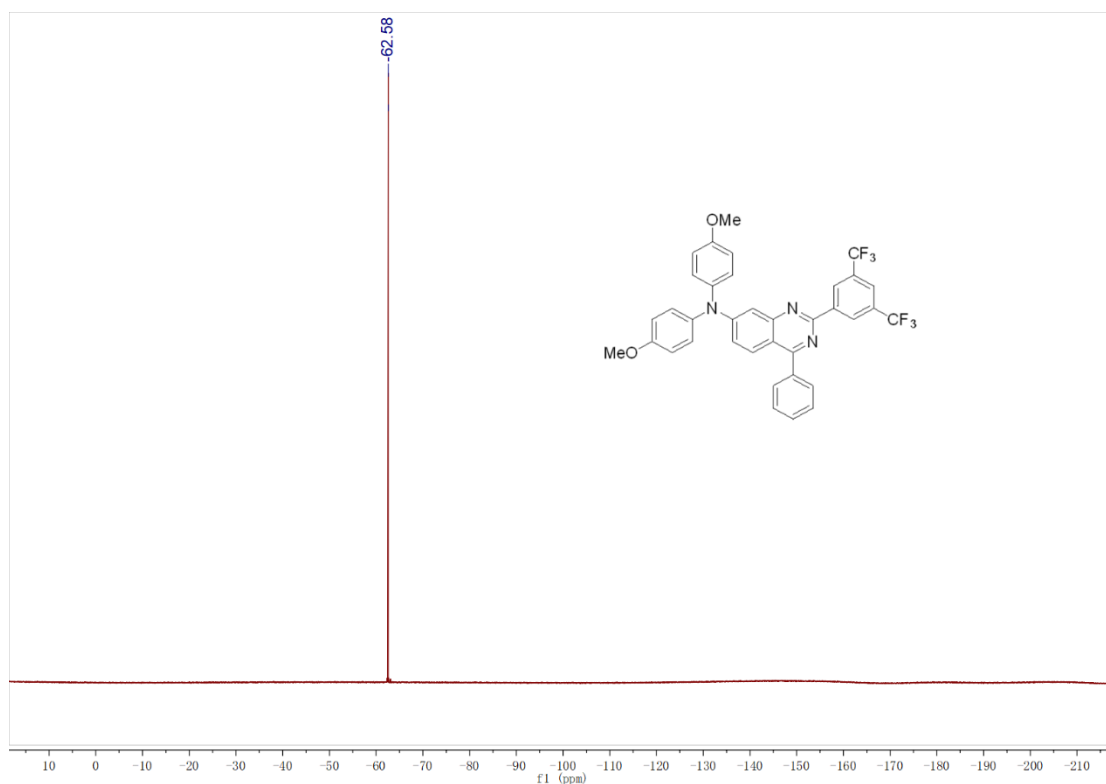

**Figure S31**  $^{19}\text{F}$  NMR of **8** in  $\text{CDCl}_3$

**Compound 9:** DCM:PE=1:4 as eluent, dark orange solid, yield >99%, mp 286-287 °C.  $^1\text{H}$  NMR (400 MHz,  $\text{CDCl}_3$ )  $\delta$  9.20 (s, 2H), 8.39 (d,  $J = 8.9$  Hz, 1H), 8.27 (d,  $J = 2.0$  Hz, 1H), 8.02 (s, 1H), 7.94 (dd,  $J = 6.6, 2.9$  Hz, 2H), 7.71 – 7.65 (m, 3H), 7.61 (dd,  $J = 8.9, 2.0$  Hz, 1H), 6.82 – 6.71 (m, 4H), 6.65 (m, 2H), 6.16 (d,  $J = 7.9$  Hz, 2H).  $^{13}\text{C}$  NMR (101 MHz,  $\text{CDCl}_3$ )  $\delta$  169.0, 157.9, 153.6, 144.9, 144.5, 140.0, 136.8, 133.2, 132.0 (q,  $J = 33.5$  Hz), 130.7, 130.6, 130.5, 130.2, 130.0, 128.9, 128.8, 124.1, 123.5 (q,  $J = 273.1$  Hz), 123.4, 122.5, 121.5, 116.0, 114.0.  $^{19}\text{F}$  NMR (376 MHz,  $\text{CDCl}_3$ )  $\delta$  -62.67. HRMS (Maldi-TOF): calcd. for  $\text{C}_{34}\text{H}_{19}\text{F}_6\text{N}_3\text{O}[\text{M}+\text{H}]^+$ , 599.1432; found: 599.1431. IR: 3080, 2916, 1610, 1488, 1390, 1324, 1280, 1130, 742, 700, 683.



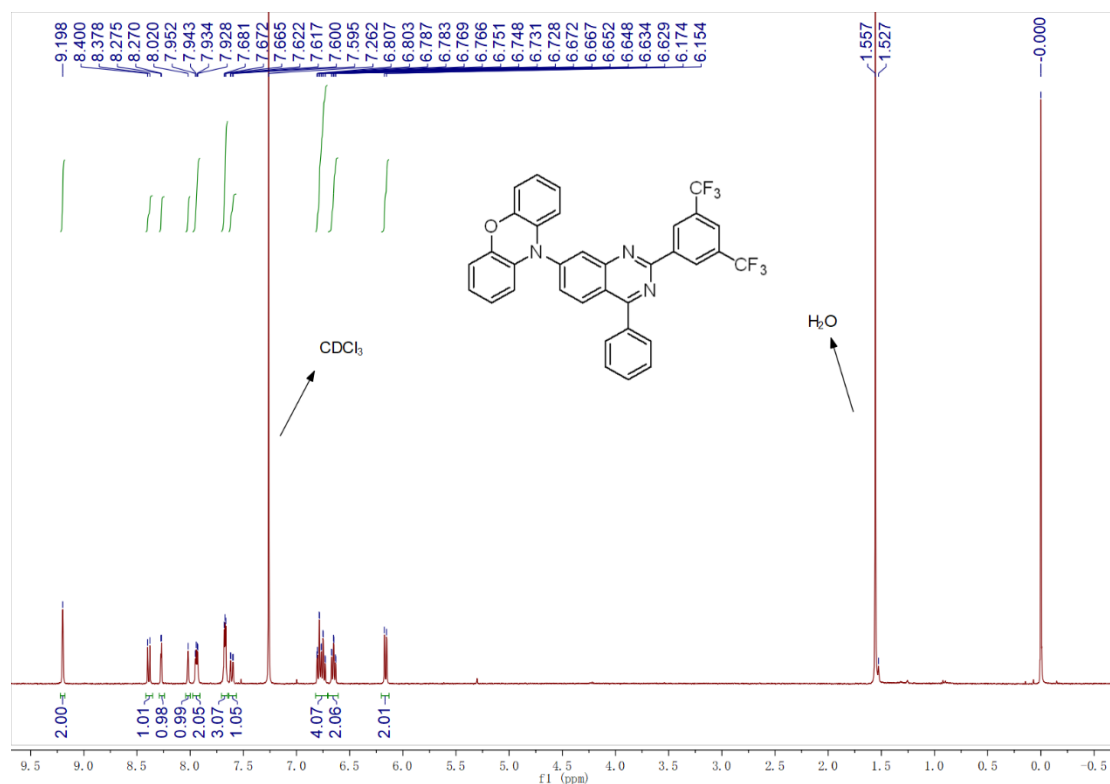

**Figure S32**  $^1\text{H}$  NMR of **9** in  $\text{CDCl}_3$

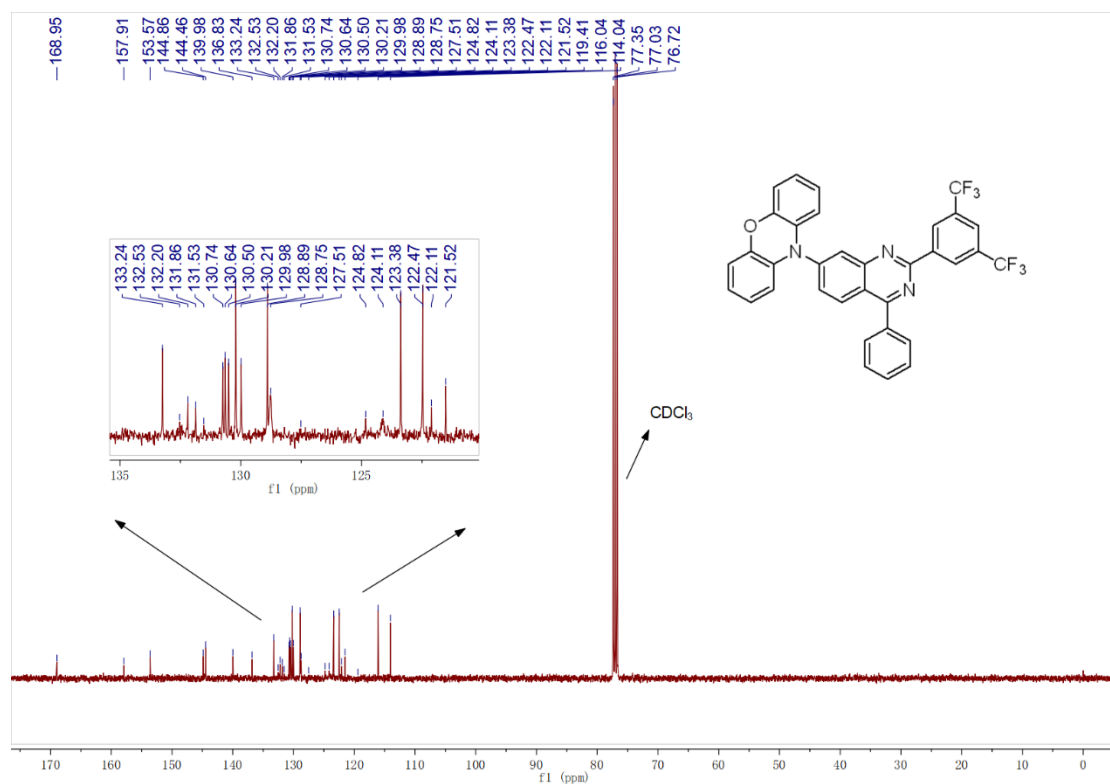

**Figure S33**  $^{13}\text{C}$  NMR of **9** in  $\text{CDCl}_3$

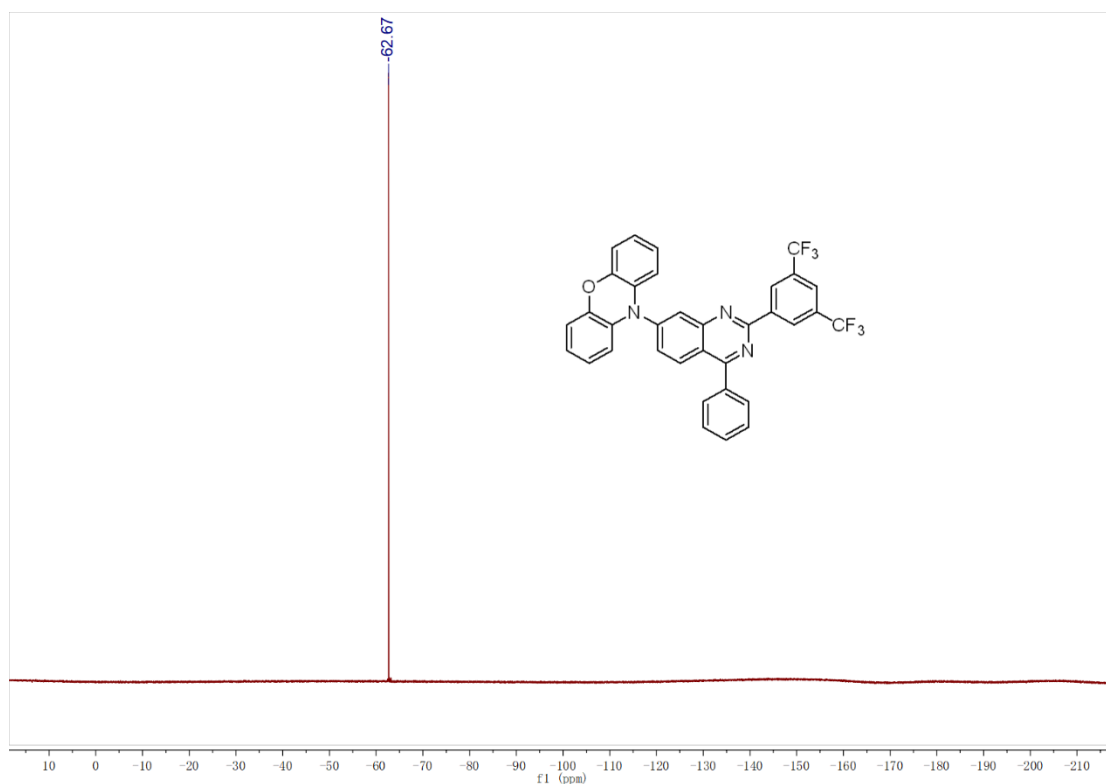

**Figure S34**  $^{19}\text{F}$  NMR of **9** in  $\text{CDCl}_3$

**Compound 10:** DCM:PE=1:1 as eluent, orange red solid, yield 86.6%, mp 248-249°C.  $^1\text{H}$  NMR (400 MHz,  $\text{CDCl}_3$ )  $\delta$  9.08 (s, 2H), 7.93 (s, 1H), 7.87 – 7.78 (m, 3H), 7.57 (dd,  $J = 5.0, 1.8$  Hz, 3H), 7.24 (s, 1H), 7.17 (d,  $J = 7.9$  Hz, 5H), 6.75 (d,  $J = 8.6$  Hz, 4H), 2.99 (s, 12H).  $^{13}\text{C}$  NMR (101 MHz,  $\text{CDCl}_3$ )  $\delta$  166.6, 157.7, 148.7, 141.1, 137.8, 135.1, 131.6 (q,  $J = 33.3$  Hz), 130.0, 129.8, 128.5, 127.9, 127.6, 123.6 (q,  $J = 272.8$  Hz), 123.3, 121.1, 116.0, 113.6, 109.83, 40.8.  $^{19}\text{F}$  NMR (376 MHz,  $\text{CDCl}_3$ )  $\delta$  -62.56. HRMS (Maldi-TOF): calcd. for  $\text{C}_{38}\text{H}_{31}\text{F}_6\text{N}_5[\text{M}+\text{H}]^+$ , 671.2484; found: 671.2481. IR: 3028, 2800, 1616, 1519, 1483, 1325, 1278, 1132, 816, 700, 682.

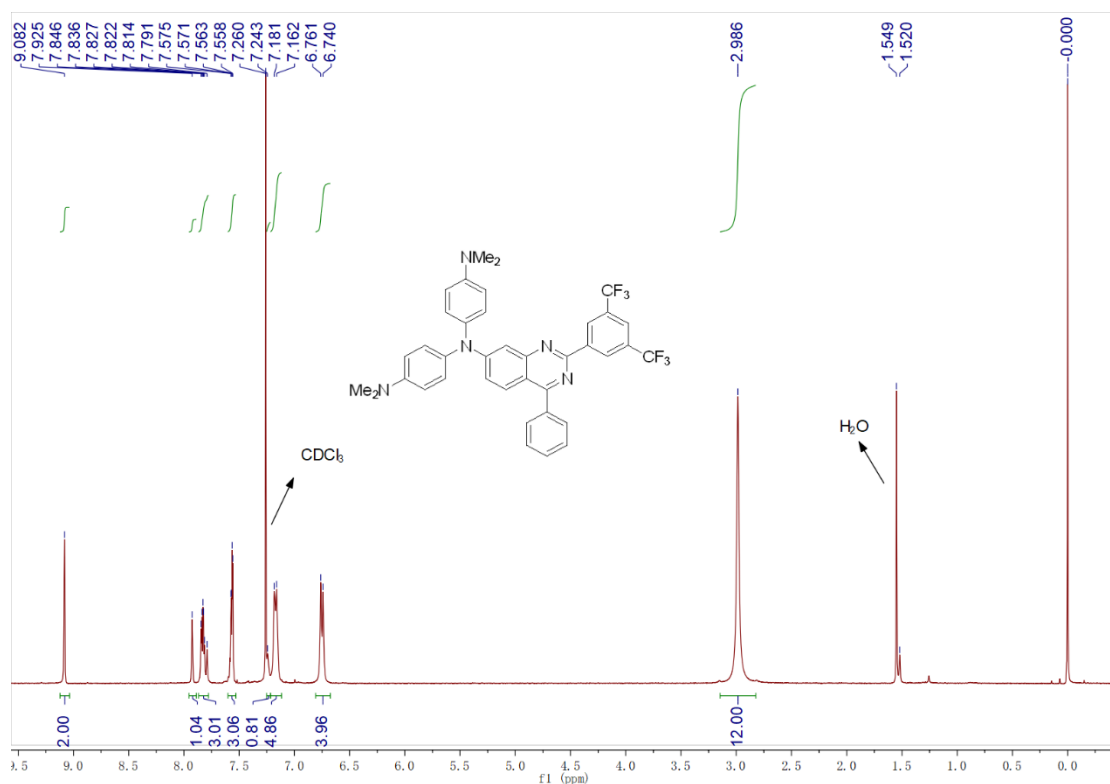

Figure S35 <sup>1</sup>H NMR of 10 in CDCl<sub>3</sub>

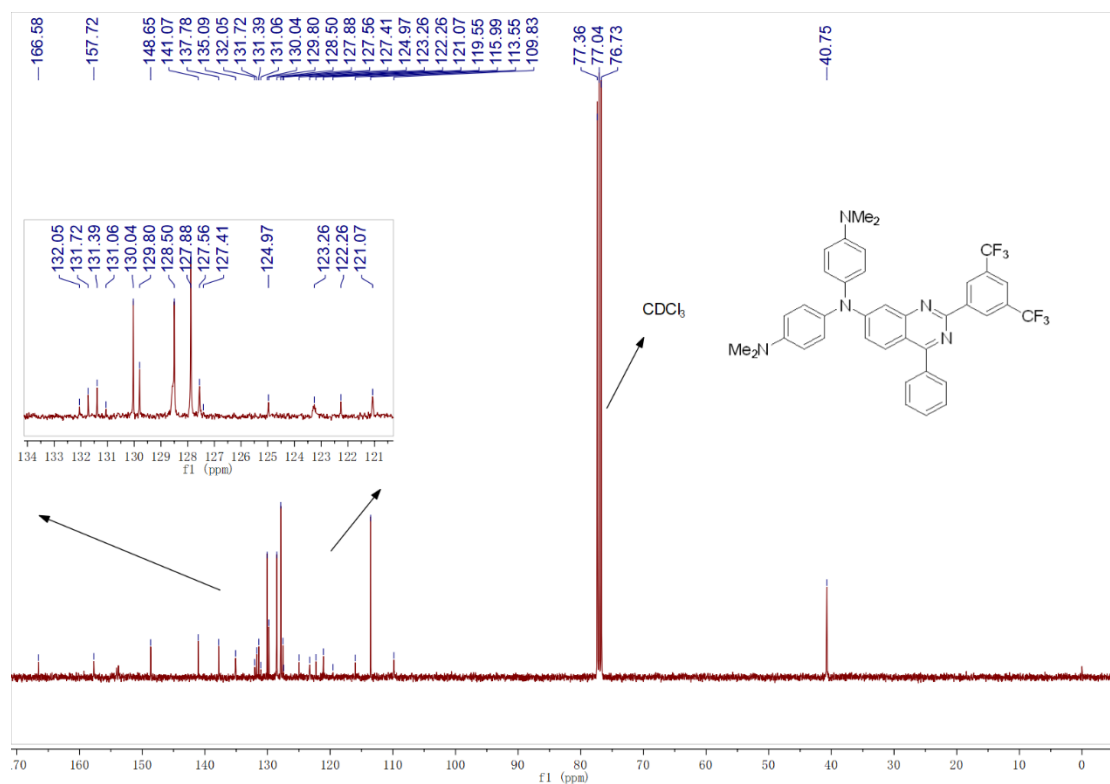

Figure S36 <sup>13</sup>C NMR of 10 in CDCl<sub>3</sub>

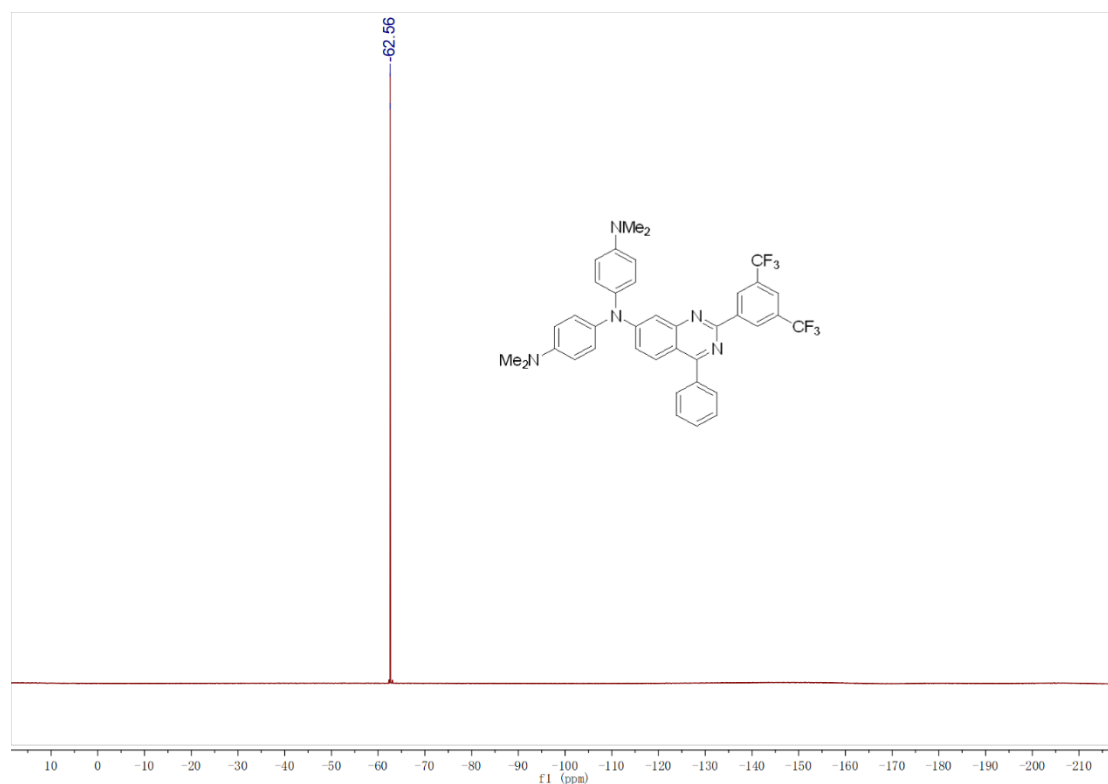

Figure S37  $^{19}\text{F}$  NMR of **10** in  $\text{CDCl}_3$

Table S1 Single crystal data of compounds **1-4**

| Compounds               | <b>1</b>                                         | <b>2</b>                                         | <b>3</b>                                                   | <b>4</b>                                                 |
|-------------------------|--------------------------------------------------|--------------------------------------------------|------------------------------------------------------------|----------------------------------------------------------|
| Formula                 | $\text{C}_{34}\text{H}_{19}\text{F}_6\text{N}_3$ | $\text{C}_{34}\text{H}_{21}\text{F}_6\text{N}_3$ | $\text{C}_{36}\text{H}_{25}\text{F}_6\text{N}_3\text{O}_2$ | $\text{C}_{34}\text{H}_{19}\text{F}_6\text{N}_3\text{O}$ |
| CCDC                    | 1961660                                          | 1961661                                          | 1961663                                                    | 1961672                                                  |
| a [Å]                   | 10.3025                                          | 9.459                                            | 9.488                                                      | 10.347                                                   |
| b [Å]                   | 15.7894                                          | 12.647                                           | 9.778                                                      | 11.159                                                   |
| c [Å]                   | 15.9352                                          | 13.633                                           | 16.834                                                     | 26.443                                                   |
| $\alpha$ [°]            | 90                                               | 92.321                                           | 105.688                                                    | 90                                                       |
| $\beta$ [°]             | 92.997                                           | 107.307                                          | 97.397                                                     | 93.920                                                   |
| $\gamma$ [°]            | 90                                               | 92.887                                           | 94.639                                                     | 90                                                       |
| Z                       | 4                                                | 2                                                | 2                                                          | 4                                                        |
| V [Å <sup>3</sup> ]     | 2588.6                                           | 1552.4                                           | 1480.1                                                     | 3072.5                                                   |
| D [g cm <sup>-3</sup> ] | 1.497                                            | 1.253                                            | 1.449                                                      | 1.480                                                    |
| Space group             | P 21/c                                           | P -1                                             | P -1                                                       | P 21/c                                                   |
| Hall group              | -P 2ybc                                          | -P 1                                             | -P 1                                                       | -P 2ybc                                                  |
| Mu [mm <sup>-1</sup> ]  | 0.119                                            | 0.099                                            | 0.117                                                      | 0.283                                                    |
| R (reflections)         | 0.0494                                           | 0.0622                                           | 0.0467                                                     | 0.0541                                                   |
| wR2 (reflections)       | 0.1422                                           | 0.1796                                           | 0.1248                                                     | 0.1463                                                   |

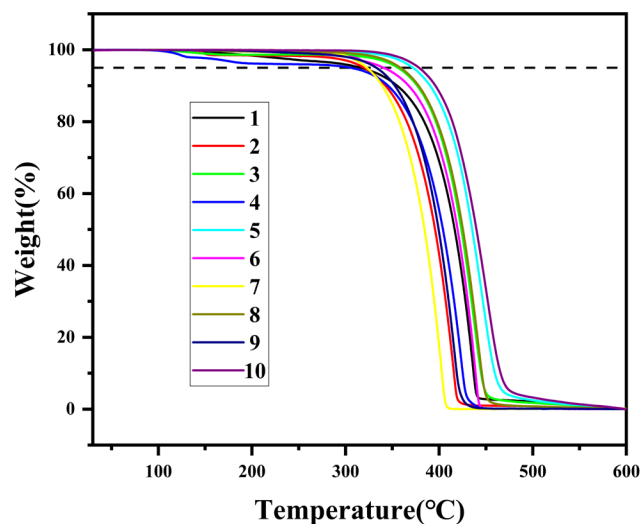

**Figure S38** Thermogravimetric Analysis of ten compounds.

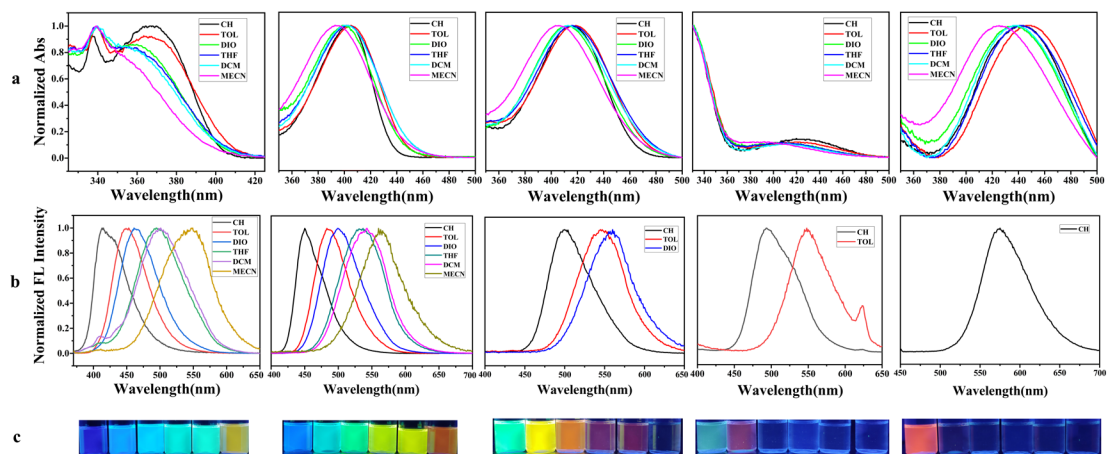

**Figure S39** Photophysical properties in different solvent: (a) absorption of **1-5** (b) emission spectra of **1-5** (excited at its corresponding maximum absorption wavelength), (c) photos of **1-5** under UV lamp (365 nm).

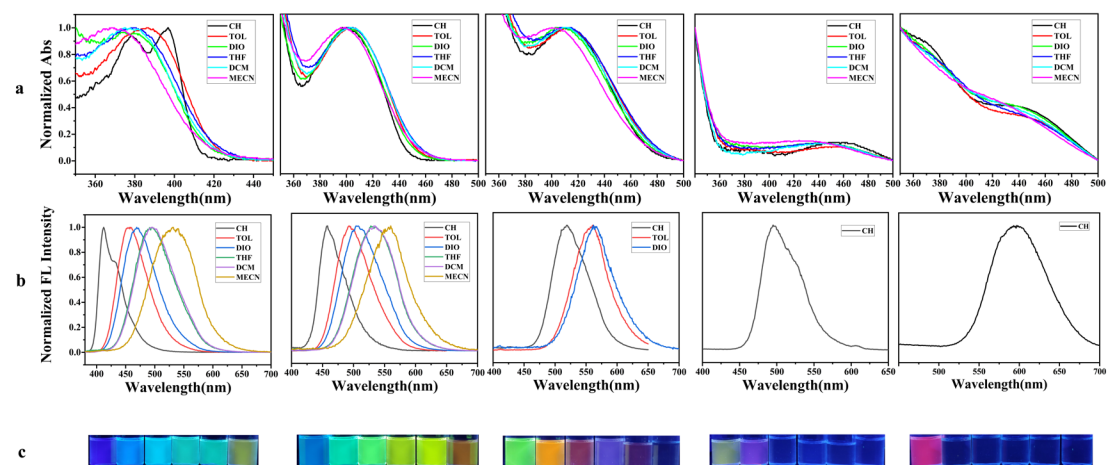

**Figure S40** Photophysical properties in different solvent: (a) Absorption of **6-10** (b) emission spectra of **6-10** (excited at its corresponding maximum absorption wavelength), (c) photos of **6-10** under UV lamp (365 nm).

**Table S2** Solvent effect on absorption and emission of ten compounds.

|    |            | CH       | Tol      | DIO      | THF      | DCM      | MeCN |
|----|------------|----------|----------|----------|----------|----------|------|
| 1  | Abs(nm)    | 338, 369 | 340, 363 | 339, 358 | 339, 354 | 340, 354 | 339  |
|    | FL(nm)     | 414      | 453      | 461      | 495      | 501      | 548  |
|    | Stokes(nm) | 45       | 90       | 103      | 141      | 147      | 209  |
| 2  | Abs(nm)    | 403      | 405      | 401      | 402      | 401      | 393  |
|    | FL(nm)     | 450      | 483      | 499      | 537      | 543      | 562  |
|    | Stokes(nm) | 47       | 78       | 98       | 135      | 142      | 169  |
| 3  | Abs(nm)    | 415      | 419      | 413      | 416      | 413      | 405  |
|    | FL(nm)     | 500      | 545      | 560      |          |          |      |
|    | Stokes(nm) | 85       | 126      | 147      |          |          |      |
| 4  | Abs(nm)    | 420      |          |          |          |          |      |
|    | FL(nm)     | 514      | 568      |          |          |          |      |
|    | Stokes(nm) | 94       |          |          |          |          |      |
| 5  | Abs(nm)    | 444      | 448      | 436      | 442      | 438      | 425  |
|    | FL(nm)     | 575      |          |          |          |          |      |
|    | Stokes(nm) | 131      |          |          |          |          |      |
| 6  | Abs(nm)    | 378, 397 | 386      | 381      | 380      | 375      | 369  |
|    | FL(nm)     | 412      | 456      | 469      | 495      | 495      | 531  |
|    | Stokes(nm) | 15       | 70       | 88       | 115      | 120      | 162  |
| 7  | Abs(nm)    | 400      | 405      | 401      | 402      | 403      | 399  |
|    | FL(nm)     | 458      | 493      | 504      | 528      | 534      | 560  |
|    | Stokes(nm) | 58       | 88       | 103      | 126      | 131      | 161  |
| 8  | Abs(nm)    | 411      | 410      | 407      | 411      | 410      | 400  |
|    | FL(nm)     | 519      | 561      | 562      |          |          |      |
|    | Stokes(nm) | 108      | 151      | 155      |          |          |      |
| 9  | Abs(nm)    | 456      |          |          |          |          |      |
|    | FL(nm)     | 533      |          |          |          |          |      |
|    | Stokes(nm) | 77       |          |          |          |          |      |
| 10 | Abs(nm)    | 436      |          |          |          |          |      |
|    | FL(nm)     | 597      |          |          |          |          |      |
|    | Stokes(nm) | 161      |          |          |          |          |      |

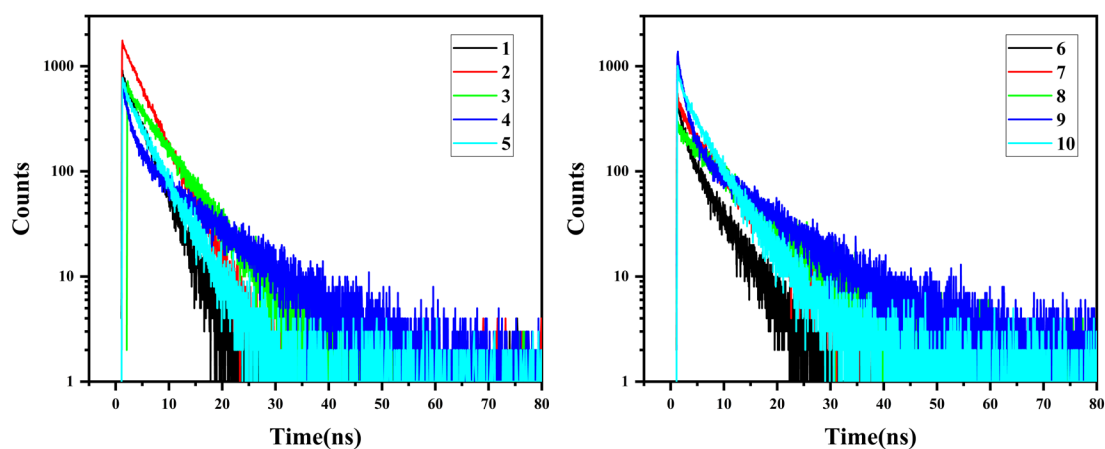**Figure S41** Fluorescence decay traces of ten compounds in cyclohexane (compounds 5 and 10) or toluene (other compounds) at  $2 \times 10^{-5}$  M.

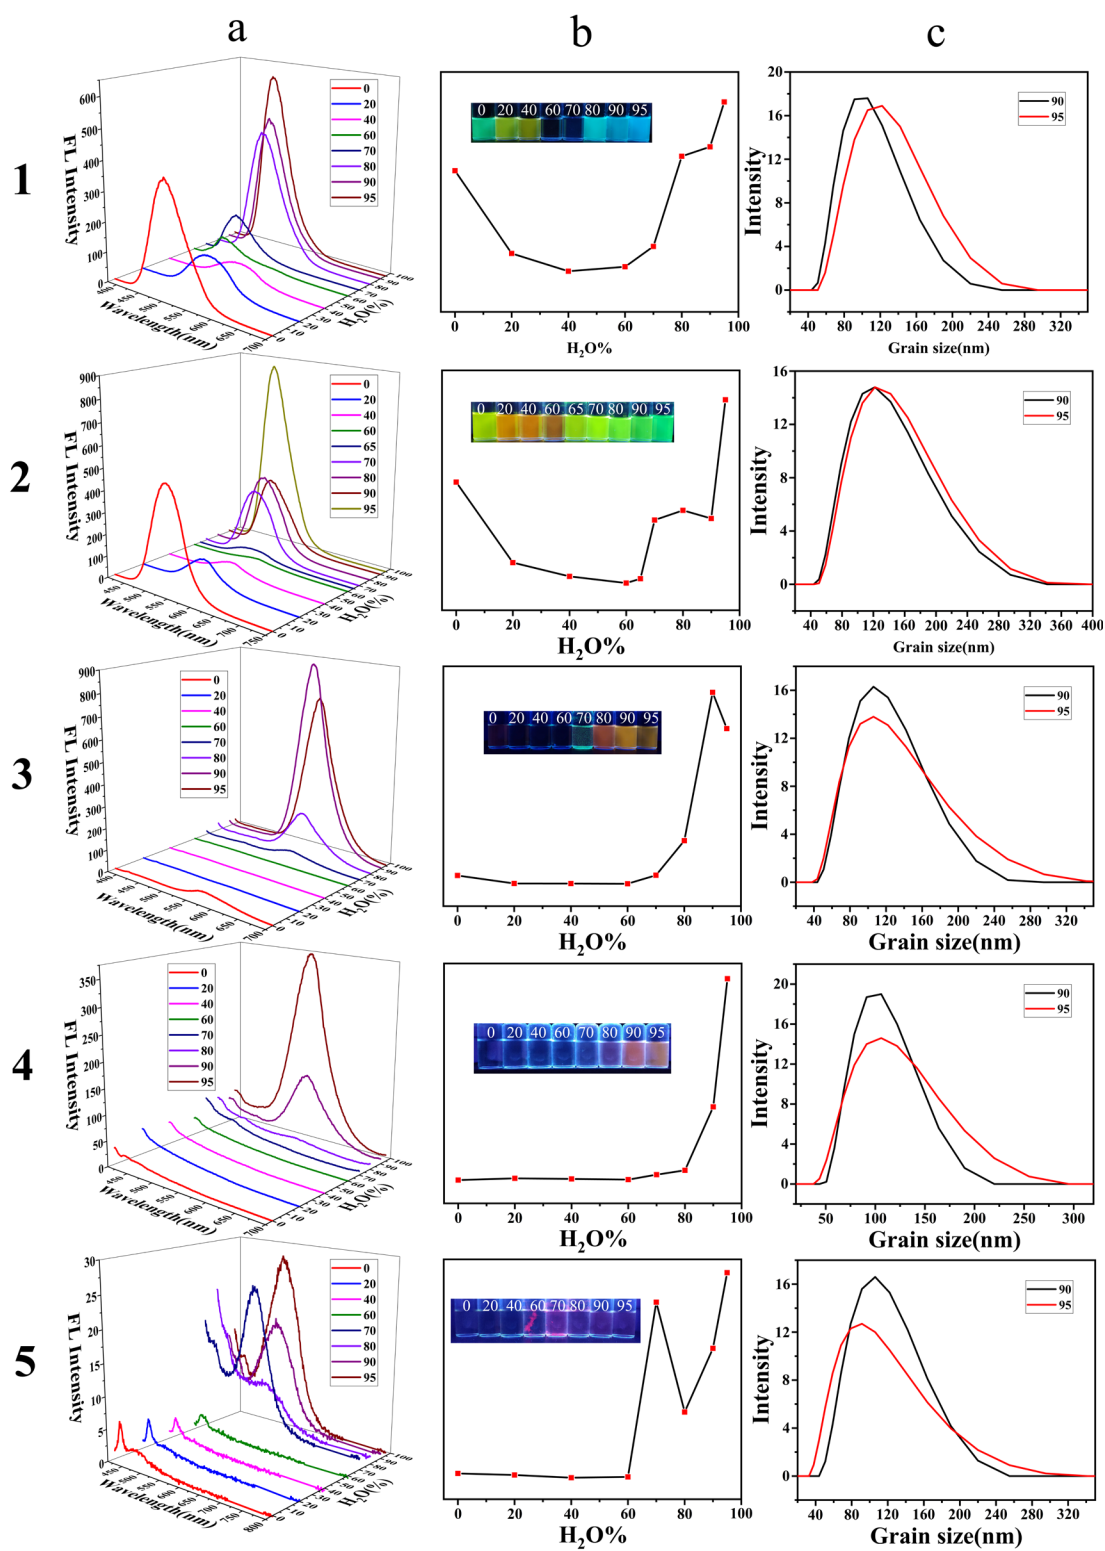

**Figure S42** (a) 3D Emission spectrum in aqueous THF solutions, (b) the relative intensity and photos and (c) DLS (fw = 90%, 95%) of compounds 1-5.

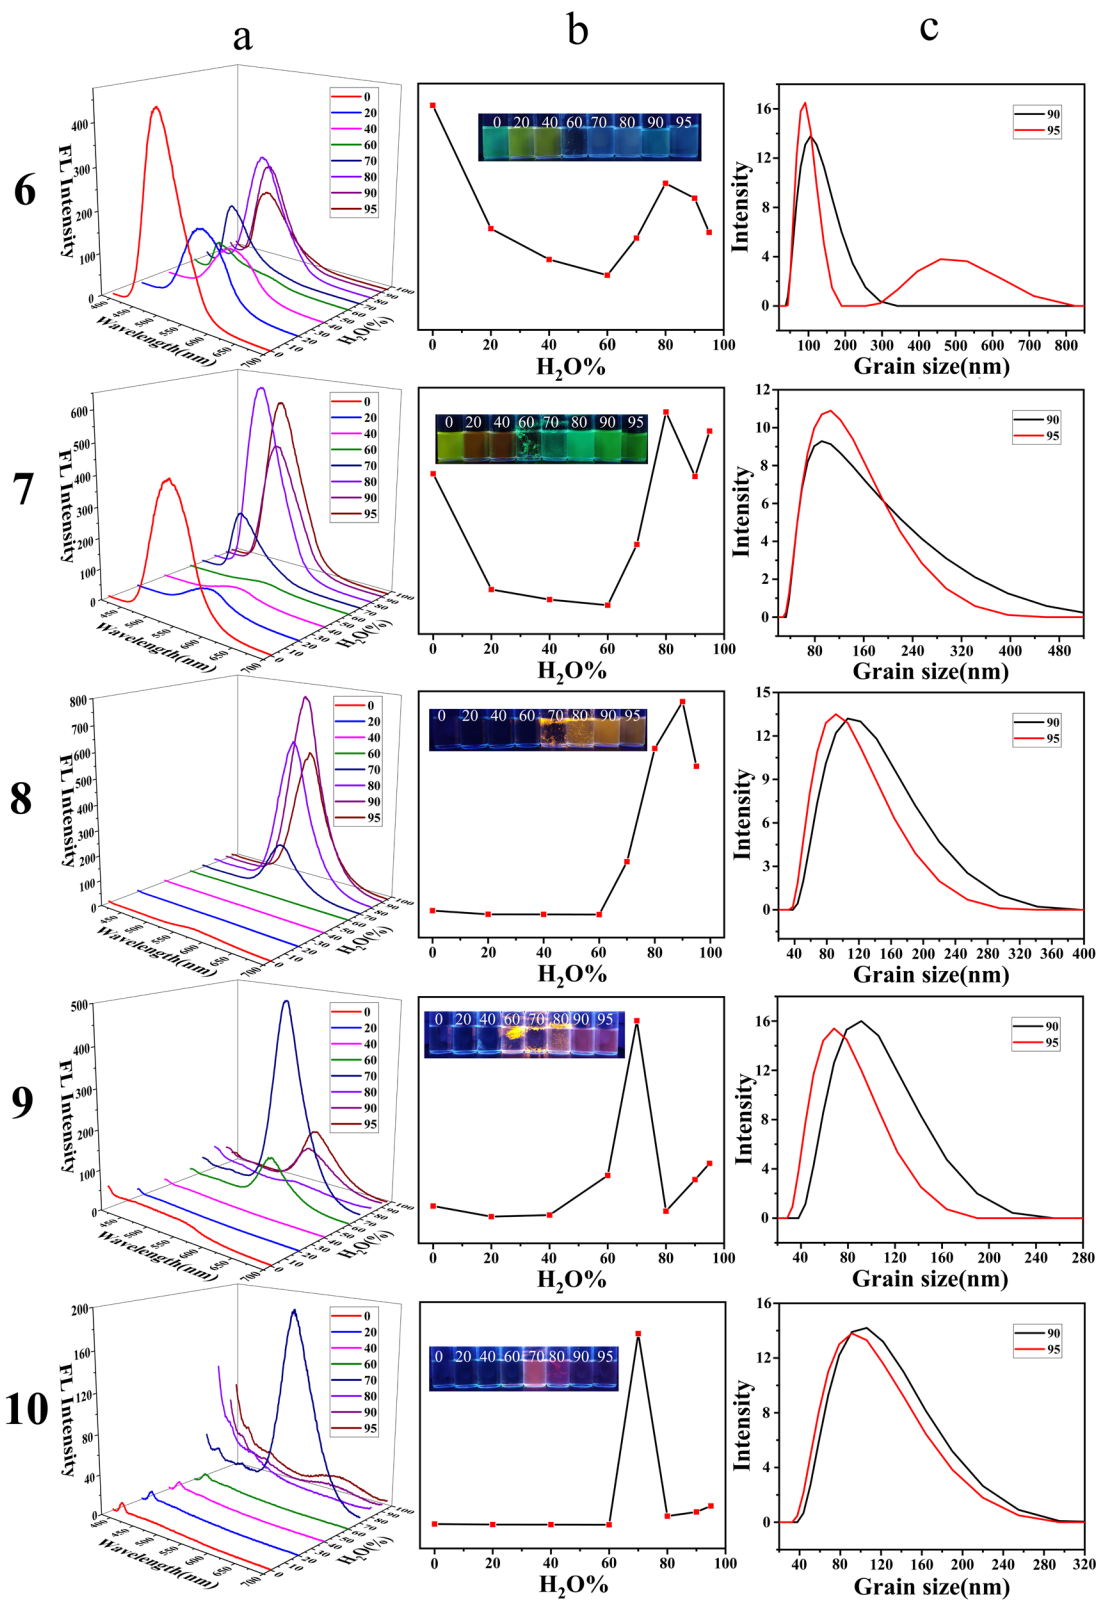

**Figure S43** (a) 3D Emission spectrum in aqueous THF solutions, (b) the relative intensity and photos and (c) DLS (fw = 90%, 95%) of compounds **6-10**.



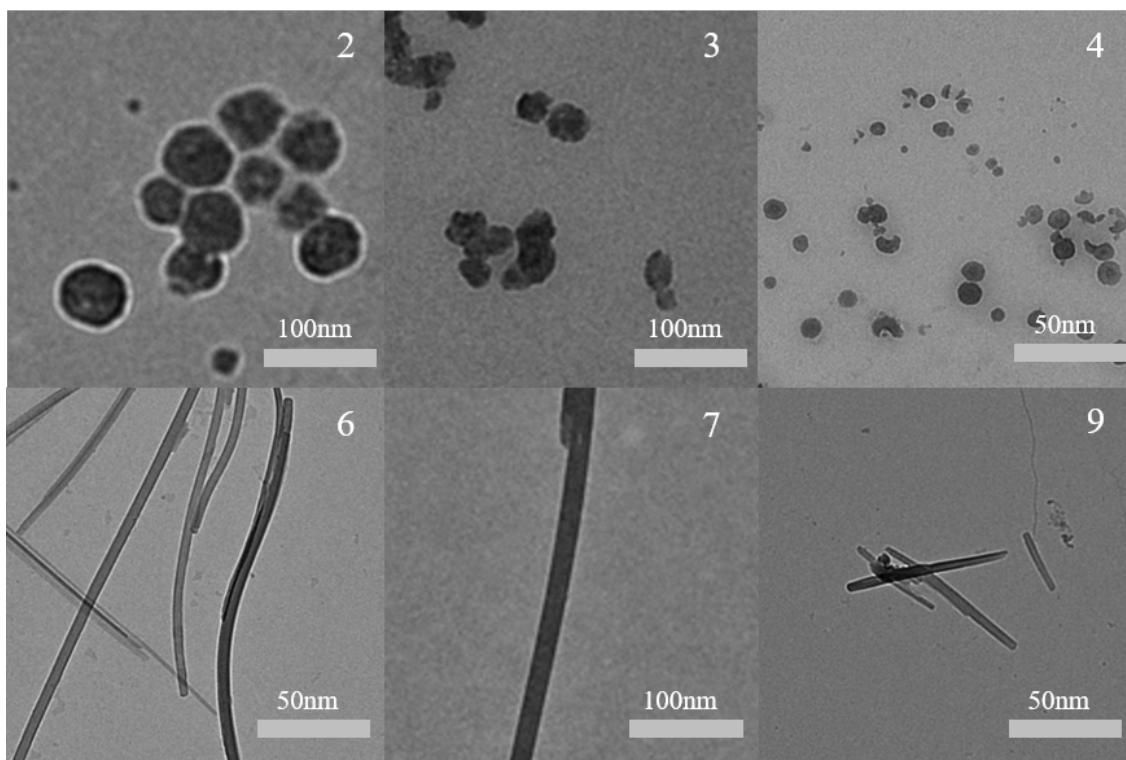

**Figure S44** TEM image in aqueous THF solutions of **2** (fw = 95%), **3** (fw = 95%), **4** (fw = 90%), **6** (fw = 80%), **7** (fw = 80%), **9** (fw = 95%).

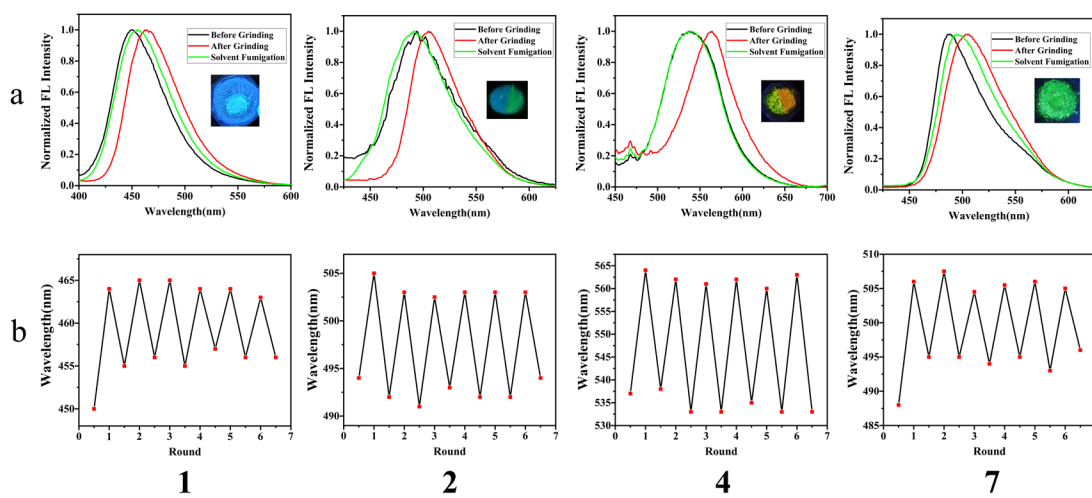

**Figure S45** Mechanochromic property of compounds **1**, **2**, **4** and **7**; a) normalized emission spectra; b) emission cycles.

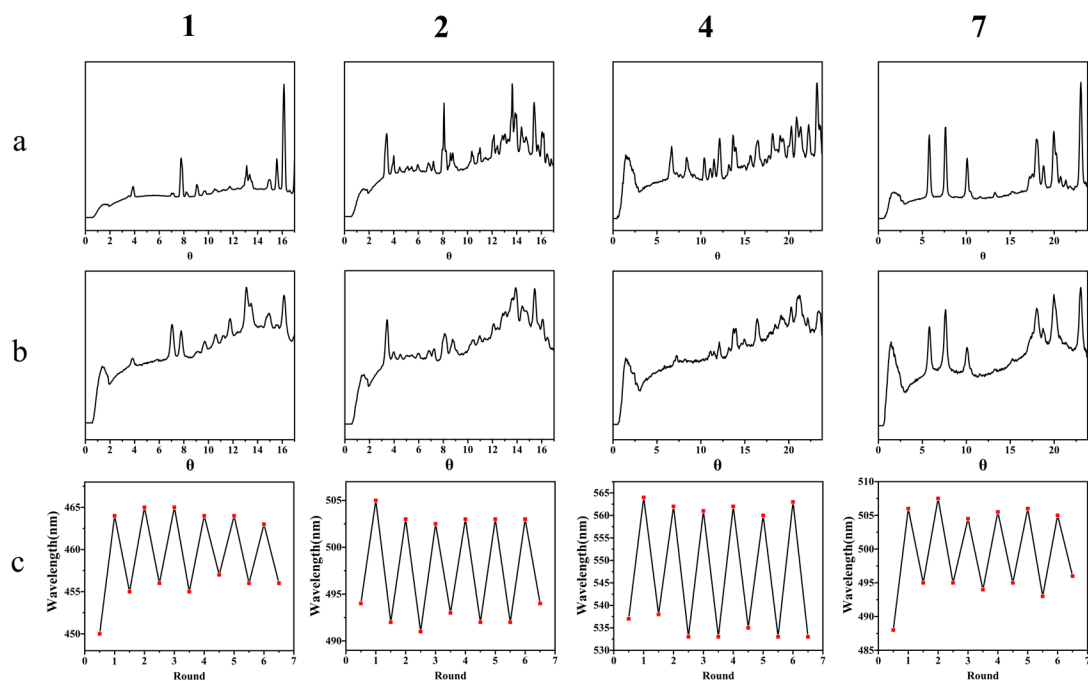

**Figure S46** SAXS analysis in the cycle of pristine (a) and ground (b), repeatable cycles, monitored by emission spectra (c) emission cycles.

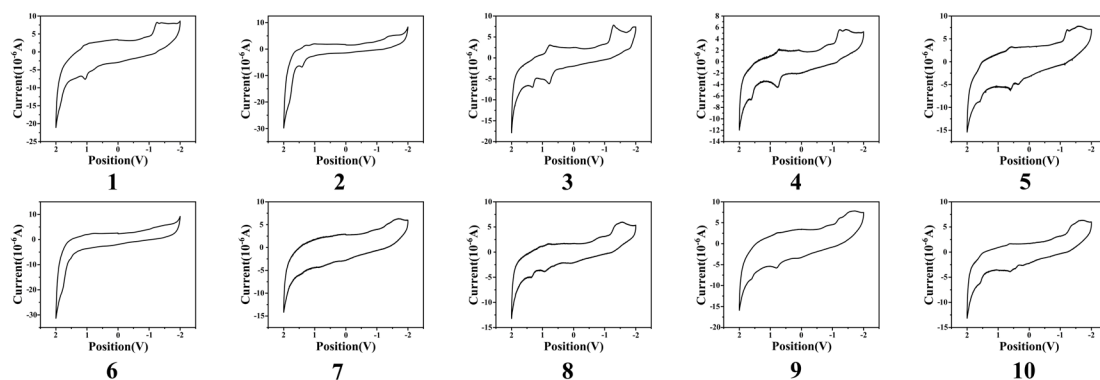

**Figure S47** Cyclic voltammograms of ten compounds.

**Table S3** HOMO/LUMO levels calculated from theoretical calculation and CV as well as UV measurements.

| Compound | HOMO                 |                        | LUMO                 |                        | E <sub>g</sub> |           |                      |
|----------|----------------------|------------------------|----------------------|------------------------|----------------|-----------|----------------------|
|          | CV <sup>a</sup> (eV) | Cald <sup>b</sup> (eV) | CV <sup>c</sup> (eV) | Cald <sup>b</sup> (eV) | CV (eV)        | Cald (eV) | UV <sup>d</sup> (eV) |
| 1        | -5.35                | -5.15                  | -3.30                | -2.06                  | 2.05           | 3.09      | 3.00                 |
| 2        | -5.79                | -5.45                  | -3.16                | -2.22                  | 2.63           | 3.23      | 2.77                 |
| 3        | -5.18                | -4.88                  | -3.28                | -1.98                  | 1.90           | 2.90      | 2.62                 |
| 4        | -5.15                | -4.72                  | -3.29                | -2.27                  | 1.86           | 2.45      | 2.63                 |
| 5        | -4.73                | -4.46                  | -3.30                | -1.9                   | 1.43           | 2.56      | 2.48                 |
| 6        | \                    | -5.55                  | \                    | -2.24                  | \              | 3.31      | 2.93                 |
| 7        | \                    | -5.35                  | -3.25                | -1.98                  | \              | 3.37      | 2.73                 |
| 8        | -5.38                | -5.05                  | -3.23                | -1.89                  | 2.15           | 3.16      | 2.56                 |
| 9        | -5.16                | -4.80                  | -3.31                | -2.3                   | 1.85           | 2.50      | 2.49                 |
| 10       | -4.85                | -4.57                  | -3.18                | -1.78                  | 1.67           | 2.79      | 2.48                 |

<sup>a</sup> Potentials vs reference electrode SCE, working electrode glassy carbon, auxiliary electrode Pt, 0.1 M Bu<sub>4</sub>N<sup>+</sup>PF<sub>6</sub><sup>-</sup>DCM, scan rate 100 mV/s, HOMO

= E<sub>ref</sub>-E<sub>ox</sub>. <sup>b</sup> Obtained from DFT using the B3LYP functional and the 6-31G(d) basis set. <sup>c</sup> LUMO= E<sub>ref</sub>-E<sub>red</sub>. <sup>d</sup>E<sub>g</sub>= 1240 / λ (UV<sub>onset</sub> in CH<sub>2</sub>).

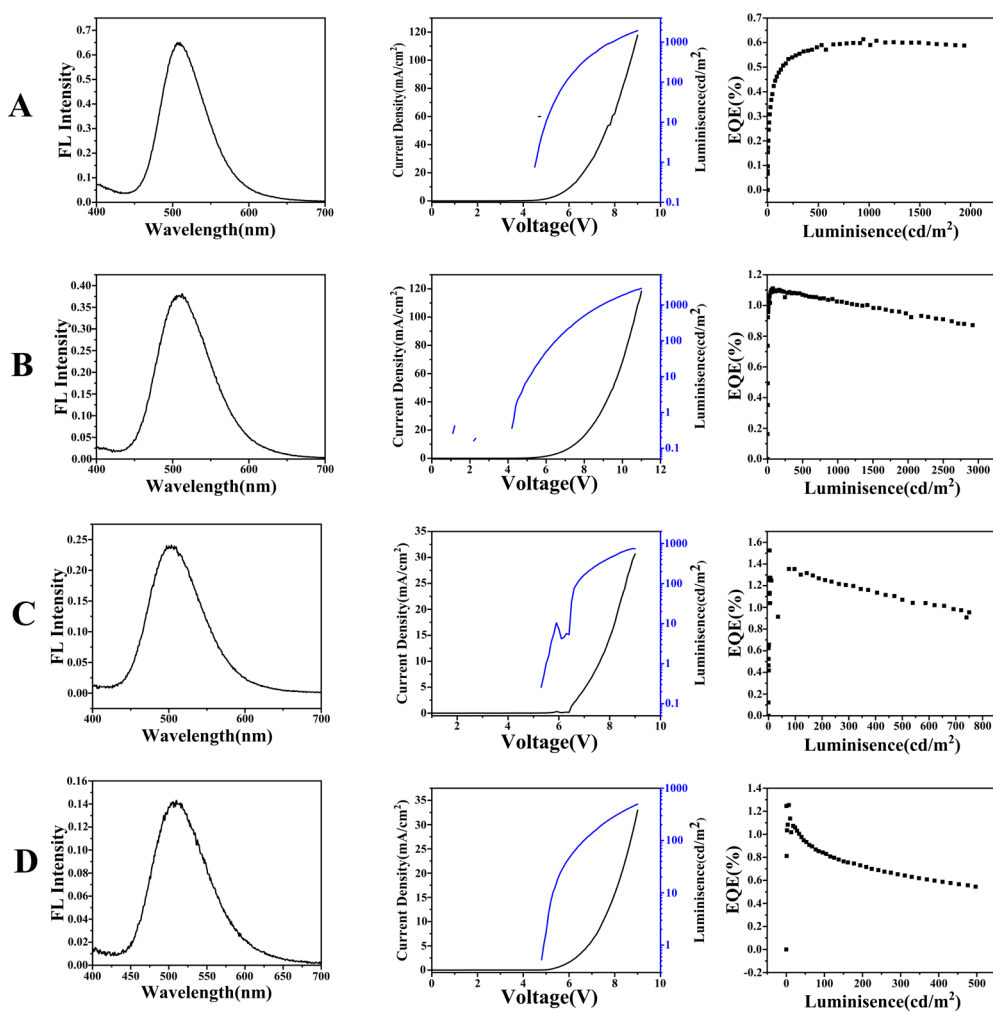

Figure S48 C-I-V curves of devices A, B, C and D.

Table S4 Device performance

| Device                                                                                          | Emitter   | $V_{\text{turn-on}}(\text{V})^{\text{a}}$ | $\text{CIE}_{1931}(x,y)$ | $\lambda_{\text{EL}}(\text{nm})$ | $\text{EQE}(\%)^{\text{b}}$ | $\text{CE}(\text{cd/A})^{\text{b}}$ | $\text{PE}(\text{lm/W})^{\text{b}}$ |
|-------------------------------------------------------------------------------------------------|-----------|-------------------------------------------|--------------------------|----------------------------------|-----------------------------|-------------------------------------|-------------------------------------|
| <b>A</b><br>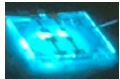 | 2         | 4.5                                       | (0.21,0.54)              | 509                              | 0.47                        | 1.35                                | 0.72                                |
| <b>B</b><br> | 2:PVK=1:4 | 4.2                                       | (0.23,0.51)              | 513                              | 1.09                        | 3.23                                | 1.56                                |
| <b>C</b><br> | 2:PVK=1:8 | 5.3                                       | (0.20,0.47)              | 497                              | 1.35                        | 3.72                                | 1.74                                |
| <b>D</b><br> | 7:PVK=1:4 | 4.8                                       | (0.23,0.50)              | 510                              | 0.83                        | 2.45                                | 1.16                                |

<sup>a</sup> Applied voltage at the luminance of 1  $\text{cd/m}^2$ .

<sup>b</sup> Value at 100  $\text{cd/m}^2$ .

## Reference

1. K. Hu, Q. Zhen, J. Gong, T. Cheng, L. Qi, Y. Shao and J. Chen, *Org Lett*, 2018, **20**, 3083-3087.
